# Supplementary material
Source: PubMed Central journal article supplement (PMC3785139)
Supplement: NIHMS53143-supplement-1.pdf [file NIHMS53143-supplement-1.pdf]

# **Elastic energy storage in the shoulder and the evolution of high-speed throwing in *Homo***

Neil T. Roach<sup>1,2</sup>, Madhusudhan Venkadesan<sup>3</sup>, Michael J. Rainbow<sup>4</sup> & Daniel E. Lieberman<sup>1</sup>

<sup>1</sup>Department of Human Evolutionary Biology, Harvard University, Cambridge, Massachusetts 02138, USA; <sup>2</sup>Center for the Advanced Study of Hominid Paleobiology, Department of Anthropology, The George Washington University, Washington, District of Columbia 20052, USA; <sup>3</sup>National Centre for Biological Sciences, Tata Institute of Fundamental Research, Bangalore, Karnataka 560065, India; <sup>4</sup>Spaulding National Running Center, Department of Physical Medicine and Rehabilitation, Harvard Medical School, Cambridge, Massachusetts 02138, USA

## Supplementary Contents

- 1 Throwing in human evolution
- 2 Modeled vs. actual power output
- 3 Muscle data
- 4 Location of elastic energy storage
- 5 Countermovement power enhancement
- 6 Chimpanzee throwing performance
- 7 Effects of projectile type
- 8 Intermediate/sham condition
- 9 Ball speed & accuracy
- 10 Timing differences between experimental conditions
- 11 Effects of the brace on force production
- 12 Humeral torsion
- 13 Lethality of hand thrown projectiles
- 14 Osteological signatures of throwing
- 15 Clavicle length in *Homo erectus*
- 16 Glenoid orientation as a throwing adaptation
- 17 Pre-enrollment performance task & data exclusion criteria
- 18 Kinematics
- 19 Experimental conditions
- 20 Filtering
- 21 Throwing phase standardization
- 22 Kinetics
- 23 Comparison to previous estimates of power

**Supplementary Note 1. *Throwing in human evolution*** - In *The Descent of Man*, Darwin proposed that the evolution of bipedality, which freed the forelimb from its primary locomotor roles, likely had profound effects on the evolution of hominin anatomy and behavior<sup>1</sup>. He specifically noted that the ability to hunt using thrown projectiles was made possible by bipedal posture. Despite Darwin's observations, the role of throwing in human evolution has been understudied compared to other derived human abilities such as walking, running, and tool making. In addition, while several researchers have inferred that throwing may have been a component of early hunting and scavenging behaviors<sup>2-15</sup>, recent research on the evolution of throwing has focused more on throwing's role in the evolution of the brain<sup>3-6,16</sup> or in the establishment of social bonds and cooperation<sup>3,12,13,17-19</sup>. Without discounting these hypotheses, we propose that the most fundamental adaptive benefit of throwing must have been for hunting, given evidence for the incorporation of animal foodstuffs, such as meat and marrow, into the hominin diet<sup>2,20-25</sup>. Calories added from meat and fat would have helped make possible selection for larger bodies, larger brains, and more offspring<sup>2,22-25</sup>. When hominins first began to eat meat regularly is difficult to pinpoint<sup>26-29</sup>, but evidence of this behavior in the fossil record appears by 2.6 million years ago<sup>27</sup> (and possibly earlier<sup>29</sup>) and seems to intensify around 1.9 Ma<sup>30-33</sup>.

How hominins gained access to meat is the subject of debate<sup>9,34-41</sup>, but regardless of whether meat was gained by persistence hunting, approach, ambush, or scavenging, the ability to kill or injure other animals at a distance using a thrown projectile would have provided a significant evolutionary benefit. Throwing a projectile such as a rock or spear could kill an animal, wound the animal making it easier to track, or drive another carnivore away from a kill. This ability to kill or wound from a distance also provides crucial space between the hunter and dangerous prey/carnivores. Without this separation, hominins would have been very poorly suited to obtaining or defending meat. First, we lack large canines and claws to fight prey or defend carcasses. We also lack the strength, speed, and stability of other carnivores. Further, our lack of fur removes some protective insulation from horns, thrusts, bites, and kicks. Even helpful technologies such as thrusting spears or clubs need to be used at very close range, exposing hominins to risk of serious injuries. Similarly, while increased group size could spread the risk of close interaction with a dangerous animal between more individuals, the fitness costs of a broken bone or punctured lung are extremely high, difficult or impossible to share, and would have been a strong negative selective force. Reducing these injury risks, even slightly, using thrown projectiles would have given any throwing hominin a potential fitness advantage. Even the relatively short distances over which modern hunter-gatherers throw spears (approximately 7m on average)<sup>11</sup> could significantly reduce the likelihood of being seriously hurt. Furthermore, an isolated report of hand thrown spears being used to hunt prey from 30-40m away suggests that these short distances over which spears are currently thrown may represent modern usage practices and not a limit on the capacity of such weapons<sup>42</sup>. Thrown projectiles may also have been used in conjunction with other hunting strategies, as has been recorded in San hunters, who after a persistence hunt have been witnessed dispatching exhausted, but still unpredictable and dangerous game, with a thrown spear<sup>43,44</sup>. Such examples of flexible, situationally adaptable hunting behavior may have been an especially important subsistence strategy as hominins left Africa and encountered new environments and prey species.

Finally, it is possible that throwing instead evolved in the context of providing a selective advantage during aggression. Numerous ethnographic and historical accounts document the importance of throwing during intergroup conflicts<sup>45-62</sup>, and occasionally between members of the same group<sup>54,63-66</sup>. Throwing proficiency could have enabled better throwing groups to monopolize desirable resources or provided good throwing males an advantage over weaker throwers in gaining access to reproductive opportunities. Although we do not discount the potential selective advantage throwing may have conferred in male aggression, there are several reasons to believe that the selective benefit of throwing during hunting was more important. First, the evidence for high-speed throwing first appears in *H. erectus*, a species that exhibits a marked reduction in sexual body size dimorphism compared to earlier hominins<sup>67-70</sup>. Such a reduction in dimorphism may represent reduced male-male aggression (or a shift to projectile aided aggression), but appears to be driven more by increases in female body size<sup>67,68,71</sup> suggesting a shift in dietary quality or food availability at this time<sup>71-73</sup>. The increased inclusion of meat into the diet could explain this shift in female body size. Further, animal carcasses represent high-quality, monopolizable resources that can be shared or traded<sup>74-76</sup>. Such a shift in food economy has been suggested to increase cooperation, likely resulting in reduced aggression<sup>73,77</sup>. Therefore, while thrown projectiles are used during male-male and intergroup aggression, we propose that such usage is likely exapted and that selection for throwing in order to hunt/scavenge is better supported by multiple lines of evidence.

Regardless of what drove the evolution of our throwing capacity, humans today are still capable of being excellent throwers. While technological improvements in armature have made hunting more effective and safer, modern foragers still occasionally employ thrown projectiles to effectively hunt even large animals<sup>1,7,11,78-87</sup>.

**Supplementary Note 2. Modeled vs. actual power output** - One way to test the hypothesis that elastic energy provides most of the rotational power for throwing is to compare estimates of the maximum power production capacity of all the muscles potentially responsible for internally rotating the humerus with the actual calculated power. The maximum power production of all internal rotators of the humerus is calculated using the average actual power during the acceleration phase, thus minimizing the effects of instantaneous changes in angular acceleration. This average actual power value is then adjusted by a mass estimate for all potentially contributing muscles (see Supplementary Note 3). This mass specific power estimate (in  $W\ kg^{-1}$ ) is then compared to published maximum mass specific power values from the literature, which range from  $\sim 250-500\ W\ kg^{-1}$  <sup>88-90</sup>. This conservative model shows that the average actual power at the shoulder exceeds the maximum isotonic power production capacity for muscle by at least 3-7 fold (Table S1).

| Supplementary Table S1 – Modeled Power Comparison               |                    |
|-----------------------------------------------------------------|--------------------|
| Maximum isotonic power - skeletal muscle ( $W\ kg^{-1}$ )       | <b>250-500</b>     |
| <b>Adjustment for force enhancement due to stretching</b>       | 1.75x              |
| Maximum modeled muscle power - skeletal muscle ( $W\ kg^{-1}$ ) | <b>438-800</b>     |
| _____                                                           |                    |
| <i><b>Predicted values</b></i>                                  |                    |
| <b>Shoulder rotation work during acceleration (J)</b>           | 132 ± 52           |
| <b>Time of acceleration (sec)</b>                               | 0.034 ± 0.013      |
| <b>Average joint power (W)</b>                                  | 3,847 ± 1967       |
| <b>Estimated total muscle mass (kg)</b>                         | 2.16               |
| Adjusted average kinetic power - acceleration ( $W\ kg^{-1}$ )  | <b>1,781 ± 911</b> |
| <i>Average kinetic power &gt; Maximum muscle power</i>          |                    |

**Table S1 | Modeled power comparison.** Average kinetic power (shoulder rotation) adjusted by modeled total internal rotator muscle mass compared to known maximum power values for skeletal muscle.

However, it is well known that when muscle is actively stretched during or just prior to concentric contraction there is a notable increase in force production <sup>91-94</sup>. Plyometric models propose that the pre-stretching of the shoulder internal rotator muscles

during arm-cocking augment force enhancement during the subsequent acceleration phase of the throw<sup>95</sup>. Accordingly, we also compared our average actual power values to force enhancement adjusted ( $1.75 \times$ <sup>93</sup>) values of maximum muscle force, ranging from  $\sim 438-875 \text{ W kg}^{-1}$ . Even with this significant force enhancement, our measured average rotational power in the shoulder exceeds the maximum muscle values by 2-4 times. Thus, in order to achieve this joint power using muscular power alone, the individuals in this analysis would require internal rotator muscles at least 2-4 times larger than those used here. Given that the muscle masses used are the largest published<sup>96</sup>, this is highly unlikely and suggests that elastic energy stored in the shoulder is used to enhance the internal rotation power output.

**Supplementary Note 3. Muscle data** – Muscle volumes used for muscle modeling are taken from the Visible Human Project data set <sup>97</sup>. These volumes are calculated from a single male subject and are the largest available in the literature (which contains other males in the 95<sup>th</sup> percentile in height and the 90<sup>th</sup> percentile in weight) <sup>98</sup>. Muscle volumes for forelimb muscle (Table S2) were calculated from MR images by Garner and Pandy <sup>96</sup>. The values used for the anterior deltoid were calculated by dividing the entire deltoid volume by three. These volumes were then converted to masses by multiplying by an empirically derived measure of mammalian muscle density from the literature <sup>99</sup>. The summed muscle mass of all internal rotators of the humerus was then used to normalize our power data by potentially contributing muscle mass. Our use of these very large muscle volumes in our analysis, as well as the assumption that all fibers are contributing at 100% of their capacity and solely to humeral internal rotation, intentionally overestimate the potential muscular contribution to joint power at the shoulder. This significant overestimation is designed to reduce the effects of error within the inverse dynamics torque estimates.

| Supplementary Table S2 –<br>Shoulder Internal Rotator Muscle Volumes (cm <sup>3</sup> ) |                              |
|-----------------------------------------------------------------------------------------|------------------------------|
| <i>Muscle (Garner &amp; Pandy 2003)</i>                                                 |                              |
| Pectoralis major                                                                        | 676.40                       |
| Latissimus dorsi                                                                        | 549.69                       |
| Anterior deltoid                                                                        | 792.87/3 = (264.29)          |
| Teres major                                                                             | 231.40                       |
| Subscapularis                                                                           | 318.52                       |
| <b>Total internal rotator volume (cm<sup>3</sup>)</b>                                   | <b>2040.30</b>               |
| <i>Muscle Density (Mendez &amp; Keys, 1960)</i>                                         | <i>1.06 g/cm<sup>3</sup></i> |
| <b>Total internal rotator muscle mass (kg)</b>                                          | <b>2.16</b>                  |

**Table S2 | Calculated total muscle volume and mass for internal rotators of the shoulder.** The largest volumes for each are taken from the literature.

**Supplementary Note 4. Location of elastic energy storage** – The purpose of our study is to determine whether elastic energy storage is indeed occurring during throwing and to propose a mechanism for the role of elastic energy storage at the level of the joints and segments. However, exactly where elastic energy is being stored at the shoulder is currently unknown. We hypothesize that elastic energy storage predominantly occurs at the glenohumeral joint, as movements at the scapulothoracic joint during the critical acceleration phase are minimal<sup>100,101</sup>. While resolving the precise location of elastic energy storage requires better data on scapular motion as well as *in vivo* soft tissue imaging of the ligaments, tendons, and muscles crossing both joints, clinical data on repetitive injuries in the shoulder do provide some preliminary insight. Throwing athletes show an increased prevalence of shoulder instability and stretching related tears and laxity in the glenohumeral ligaments and at the origin of the biceps tendon on the superior glenoid labrum<sup>102-104</sup>. Over-stretching injuries to these elastic structures suggest they may be involved in storing elastic energy. For example, by actively positioning the arm during the early cocking phase a number of shoulder ligaments are pulled taut (anterior band of the inferior glenohumeral ligament, the middle glenohumeral ligament, and the coracohumeral ligament)<sup>105</sup>. It is quite likely that during the following late cocking phase, when the humerus is further passively rotated, these already taut ligaments stretch considerably. Furthermore, microscopic analyses of the glenohumeral ligaments in those suffering from shoulder instability (found frequently in throwing athletes<sup>106</sup>) show higher amounts of elastin present in these ligaments and an increase in the number of large diameter collagen fibrils<sup>107</sup>, effectively making these ligaments more tendon-like.

The internal rotator muscle tendons are a likely energy store. Similar to ligaments, muscle tendons are also frequently injured in throwing athletes<sup>108-110</sup>. For example, the attachment site of the long head of the *Biceps* muscle on the superior glenoid labrum is often the site of SLAP tears or lesions. These tears occur when large stresses are repetitively applied to the labrum via the biceps tendon<sup>111</sup>, such as occur during the isometric and eccentric contraction of the biceps during the throwing motion. During normal, injury free throwing, such muscular contractions will pull the biceps tendon taut and potentially stretch this tendon, allowing for elastic energy storage. Rotator cuff tendon tears are also frequent in throwing athletes<sup>109,112</sup>, although many of these tears likely do not result from elastic energy storage, but rather from impingement<sup>106,110,113,114</sup> or tensile failure as these muscles resist high distraction forces<sup>115-117</sup>. However, it is worth noting that the *Subscapularis* muscle is highly eccentrically activated during the arm cocking phase<sup>118</sup>, despite lower distraction forces during this phase than during the acceleration and deceleration phases<sup>116</sup>. Given this muscle's action (as an internal rotator of the humerus), eccentric contraction of the *Subscapularis* as the humerus externally rotates during cocking could stretch the *Subscapularis* tendon and store elastic energy. Likewise, forceful eccentric contractions of the other internal rotator muscles (*Pectoralis major*, *Latissimus dorsi*) during the cocking phase<sup>118-120</sup> could also result in their tendons stretching and storing elastic energy.

While the elastic structures in the shoulder are not typical of those used by many animals to store elastic energy, it is important to make a distinction regarding how most animals use such stored energy. Many animals use long tendons (such as the Achilles), attached to pennate muscles to store elastic energy for increased locomotor efficiency



<sup>88,93,121-123</sup>. However, while such long tendons can stretch considerably and store large amounts of elastic energy, the rate at which long tendons recoil and release that energy will be slower than for a shorter elastic element. When returning elastic energy very quickly is important, as is the case for power amplification, shorter tendons and ligaments can be more effective. Such may be the case in the human shoulder, where the average length (weighted by cross-sectional area - CSA) of the internal rotator muscle tendons (58 mm <sup>124</sup>) is comparable to (patellar tendon – 48 mm <sup>125</sup>) or shorter than (Achilles – 120 mm <sup>126</sup>) the large tendons in the lower limb. Furthermore, although there is no single elastic element in the shoulder that could store all of the elastic energy essential to throwing mechanics, the CSA of the internal rotator muscle tendons alone is 3.5-6 fold greater than that of either large tendon in the leg <sup>124-128</sup>. Accordingly, we propose that as a complex, the short length and large aggregate CSA of the numerous ligaments and muscle tendons act in parallel across the shoulder allowing these elements to return large amounts of elastic energy very rapidly (a hypothesis that requires further study).

Finally, it is worth noting that the failure stresses of the shoulder ligaments (~5-11.5 MPa <sup>129-132</sup>) and muscle tendons (*Biceps* ~32.5 MPa <sup>128</sup>; *Subscapularis* ~ 43 MPa <sup>133</sup>) are lower than the failure stresses measured in the elastic elements of the lower limb <sup>134-136</sup>. We suggest that these differences likely reflect the differential frequency and repetitiveness of locomotor versus throwing behaviors. Given the comparative weakness of the shoulder elements, it is likely crucial to spread all forces involved in storing elastic energy in the shoulder across multiple ligaments and tendons. We further hypothesize that when this force distribution is poorly controlled (such as when a throwing athlete fatigues), the repetitive overreliance on single elastic elements could lead to their failure and result in injury.

**Supplementary Note 5. Countermovement power enhancement** - Many rapid, powerful movements are preceded by an initial countermovement in the opposite direction. Such countermovements have been shown to increase the performance of the following motion<sup>137-141</sup>. For example, countermovement jumps, in which an athlete quickly squats before jumping, show increased jump height when compared to non-countermovement squat jumps<sup>138-144</sup>. Numerous studies have shown that the knee and ankle extensor muscles responsible for powering jumps are highly active during the initial countermovement<sup>145-147</sup>. The eccentric lengthening of these muscles during countermovement followed by the rapid concentric shortening as the motion occurs have also been termed the “stretch-shortening cycle” or “SSC”<sup>148-150</sup>. However, how this countermovement enhances performance is unknown. Previous studies have suggested that countermovement/the SSC enables more time for muscles to become fully active<sup>141,151,152</sup>, that muscle pre-stretch allows them to reach optimal sarcomere lengths for maximal force production<sup>153-155</sup>, that stretching induces further reflexive muscle activation<sup>149,156</sup>, and/or that this stretching enables elastic energy storage<sup>137,157,158</sup>.

While the mechanics and performance enhancement of countermovement/SSC have been well studied for running and jumping, few studies have examined this phenomenon in the upper body<sup>159-164</sup>. Although the throwing windup is frequently described as an important countermovement<sup>141,149,160,165-167</sup>, very little attention has been paid to the mechanics of this portion of the throw. Mathematical modeling of the windup during throwing suggests that “moment reversal” from countermovement to forward movement results in increased throwing distance and velocity<sup>168-170</sup>. An experimental study of seated throwers with their throwing arms resting on a table showed improved wrist velocity with an unimpeded countermovement external rotation of the shoulder<sup>162</sup>. Elliott and colleagues<sup>162</sup> further suggest that elastic energy likely played a minimal role in this velocity enhancement. Another study of a two-handed, overhead medicine ball throw from a supine position found a countermovement power enhancement at the shoulder<sup>164</sup>. However, although these studies suggest that countermovement may play a significant role in throwing performance, the experimental/modeling conditions have been largely artificial. To date, no study of this phenomenon has been conducted under normal, high-speed throwing conditions. Furthermore, the role of elastic energy storage in the human forelimb is currently unknown for all mechanical tasks, including throwing.

We seek to address the effects of countermovement at the shoulder under normal throwing conditions and specifically test whether elastic energy storage plays an important role in determining throwing performance. The mechanism we propose is used to enhance throwing power relies on an external rotation of the humerus occurring just prior to the rapid internal rotation motion around the same joint axis. While this arm-cocking countermovement is similar in a number of respects to the squat preceding a countermovement jump, we hypothesize that this counter rotation is driven by a different and novel mechanism (the inertial mass of the forelimb). We further propose that this countermovement during throwing enhances performance by loading the elastic elements crossing the shoulder, storing elastic energy and powering the subsequent internal rotation motion.

**Supplementary Note 6. Chimpanzee throwing performance** – Although data exist on the frequency of chimpanzee throwing behavior<sup>171-174</sup>, all published descriptions of their throwing performance have been qualitative. We collected preliminary throwing velocity data (Table S3) from 3 chimpanzees with previous overhand throwing training at a sanctuary in Auburn, CA. While not directly comparable to human throwing data due to limited practice and training, these data further illustrate the lack of projectile velocity, corroborating previous published accounts.

Although chimpanzees are facultative rather than skilled throwers, chimpanzee throwing behavior and anatomy can provide insight into the performance effects of morphological differences between these two species. We use a model that compares human and chimpanzee throwing performance because we are interested in assessing how differences in skeletal morphology affect throwing ability. Furthermore, because many aspects of early hominin upper body anatomy more closely resembles that of chimpanzees<sup>175-177</sup>, they are a useful comparator for humans and are helpful in assessing throwing performance in the fossil record. Regardless of whether the human-chimpanzee last common ancestor was behaviorally chimpanzee-like<sup>176-178</sup> or not<sup>179,180</sup>, comparisons of human throwing mechanics and performance to that of chimpanzees can provide valuable insights for interpreting how throwing performance and skeletal anatomy are related.

| Supplementary Table S3 –<br>Chimpanzee throwing velocity (mph) |                                    |                                    |                                     |
|----------------------------------------------------------------|------------------------------------|------------------------------------|-------------------------------------|
|                                                                | <i>Juvenile Male<br/>(3 years)</i> | <i>Juvenile Male<br/>(9 years)</i> | <i>Adult female<br/>(~30 years)</i> |
| Mean velocity                                                  | 12.4                               | 12.5                               | 19*                                 |
| N                                                              | 17                                 | 18                                 | 12*                                 |
| Maximum velocity                                               | 14.3                               | 15.5                               | 22.4*                               |
| Standard Deviation                                             | 1.4                                | 1.7                                | 2.4*                                |

**Table S3 | Throwing velocity data from 3 chimpanzees.** Note: while the adult female had previously been trained to throw overhand, during data collection she chose to throw underhand (while standing bipedally). Her data has been asterisked accordingly.

**Supplementary Note 7. *Effects of projectile type*** – For practical reasons, we chose to collect data on individuals throwing standard baseballs. However, given that hominin throwers were likely throwing objects such as rocks and untipped spears, it is worth noting how throwing kinematics differ between projectile types. While the throwing literature largely focuses on baseball throwing, there are a number of studies addressing the throwing kinematics of footballs<sup>120,181-183</sup>, handballs<sup>184-186</sup>, and javelins<sup>187-189</sup>. These projectiles differ from baseballs in both mass and shape. Results from these studies show that a standard sequence and timing of motions is conserved across all throw types<sup>181,190</sup>. Importantly, these standard kinematic patterns include consistent external rotation of the arm into the passive ROM during the arm-cocking phase, when we propose that elastic energy is stored<sup>181,191,192</sup>. Modeling research by Alexander<sup>193</sup> suggests that projectile mass may be important in dictating arm position differences during the arm-cocking phase. These positioning differences, where heavier projectiles are positioned closer to the shoulder joint by reducing arm abduction angle and increasing elbow flexion, may help to reduce the arm's moment of inertia during cocking to prevent damage to the ligaments and tendons crossing the shoulder. Data on arm positioning during the cocking phase suggest that this may be the case for a number of heavier projectiles (handball ~ 450g; shot put - 7260g)<sup>192,194</sup>. Such a constraint may have compromised hominin throwing performance when throwing heavy projectiles or affected the choice of how heavy a projectile was thrown. Scarce ethnographic data on hand-thrown spears suggests that human hunter-gatherers choose lighter spears (averaging 184g)<sup>195</sup>, potentially to avoid injury or compromised throwing mechanics. Projectile shape likely also has effects on throwing kinematics, especially in the positioning of the hand.

Elongated projectiles (such as footballs, javelins, or spears) require that the palm of the hand is positioned alongside the elongated axis the projectile, as opposed to spherical projectiles (such as baseballs, handballs, etc...) where the palm is typically positioned behind the projectile<sup>196,197</sup>. When throwing elongated projectiles, this is accomplished through a more supinated position of the forearm. While this more supinated forearm position is required of both football quarterbacks and javelin throwers, the kinematics of hominin spear throwing were likely more similar to those of football passing than javelin throwing. This is because spear throwing for hunting as well as football passing require both power and accuracy in order to be effective, while javelin throwing requires only power, as the marker of performance is simply the distance the javelin has travelled from the thrower. For this reason, the differences between baseball pitching and javelin throwing (including the run up and unstable release) will not be discussed here. Detailed comparisons of the football passing and baseball throwing motions show that while these motions are largely similar, football quarterbacks tend to achieve slower torso rotational velocities and faster shoulder flexion velocities<sup>181</sup>. Quarterbacks also externally rotate their arm ~9° less than baseball pitchers during the cocking phase<sup>181</sup>. It has been suggested that these differences in football passing kinematics may be accommodations to the increased mass of the football (~ 415g), in order to reduce the risk of injury to the shoulder and elbow<sup>181</sup>. Similar kinematic accommodations may have been employed by spear throwing hominins for the same purpose. It is also worth noting that throwing athletes from all sports show reduced humeral torsion in their dominant arm versus non-dominant arm<sup>198-202</sup>.

**Supplementary Note 8. Intermediate/sham condition** – Data were collected for an intermediate condition in which the shoulder brace was applied, but the restriction mechanism was not loaded. This intermediate condition allows for the analysis of the effect of the brace itself somewhat independently of the restriction. In this condition, the shoulder brace acted like a tight-fitting jacket and reduced external rotational range of motion at the shoulder approximately  $-11^\circ$  (compared to the restricted condition which limited external rotational ROM  $-24^\circ$ ). This intermediate level of restriction resulted in a small but significant reduction in maximum projectile velocity from the normal trials. However, the intermediate condition showed significantly higher projectile velocity than the restricted condition. Kinetic data show this intermediate condition is largely indistinguishable from the normal condition (Figure S1), with the exception of the shoulder rotation work done during the arm cocking phase which drops  $-9\pm 13\%$  ( $p < 0.05$ ) from the normal condition.

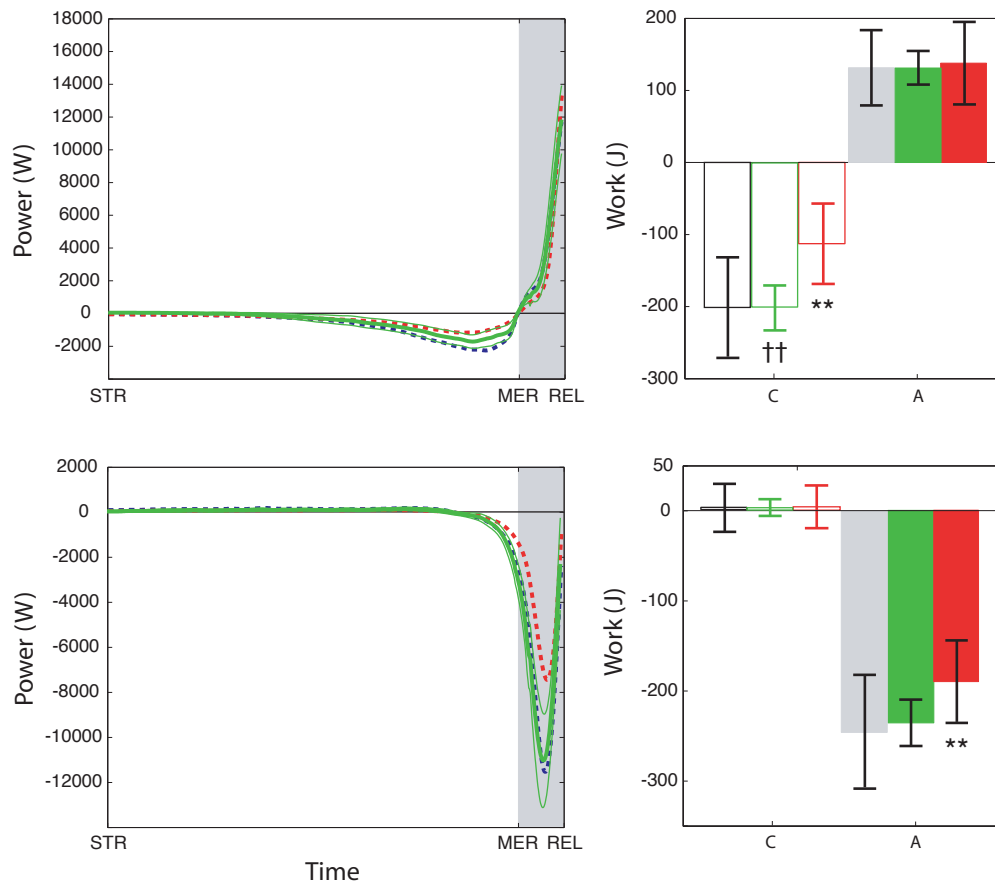

**Figure S1 | Intermediate/Sham condition.** Mean joint power and work (green) for the sham condition. The mean values for the normal condition (blue dashed, grey) and restricted condition (red dashed, red) are shown for comparison. A 95% confidence interval ( $\pm 2$  st. error) bounds the mean sham values in the power curve and all work values. Significant reductions ( $p < 0.05$ ) from both the normal and intermediate conditions are indicated by \*\*, while the †† indicates significant differences from both the normal and restricted conditions.

**Supplementary Note 9. Ball speed & accuracy** – Mean maximum ball speed was compared across experimental conditions (Figure S2). Significant differences were found between condition means (MANOVA –  $p < 0.0001$ ), but not between condition variances (Levene’s –  $p = 0.94$ ). Post-hoc pairwise comparisons showed significant differences between all three conditions. As expected, the intermediate condition in which the brace was worn but not tightened showed an intermediate reduction in ball speed, while the full restriction showed a greater reduction. Mean accuracy was also compared across conditions. No significant differences were found between conditions for mean accuracy (repeated measures ANOVA -  $p = 0.1485$ ) or variance (Levene’s –  $p = 0.4574$ ). Within all conditions, no condition order effects were found in either speed or accuracy.

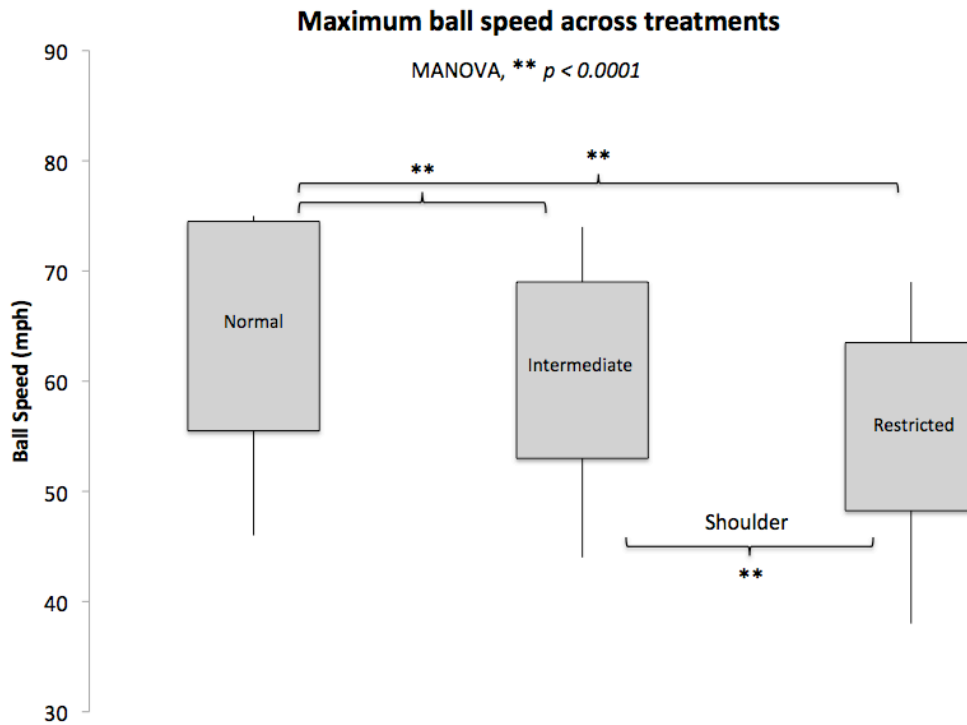

**Figure S2 | Maximum ball speed across conditions.** Maximum ball speed across treatment conditions showed significant differences between all conditions as expected.

**Supplementary Note 10. Timing differences between experimental conditions –**

Experimental conditions involving the brace showed significantly different timing in both the duration and relative duration of the arm-cocking (repeated measures ANOVA,  $p = 0.0255$ , Mauchly's sphericity = 0.2404) and acceleration phases (MANOVA,  $p = 0.0024$ , Mauchly's sphericity < 0.0001) (Figure S3). Post-hoc pairwise testing shows these differences are due to reduction of the arm-cocking phase and elongation of the acceleration phase in the restricted condition. The reason for the change in cocking duration is not clear, but the elongated acceleration seems to represent a slowdown associated with reduced acceleration of the arm due to the lack of elastic energy storage in this condition. Such reduced acceleration could delay the moment of release and elongate the acceleration phase.

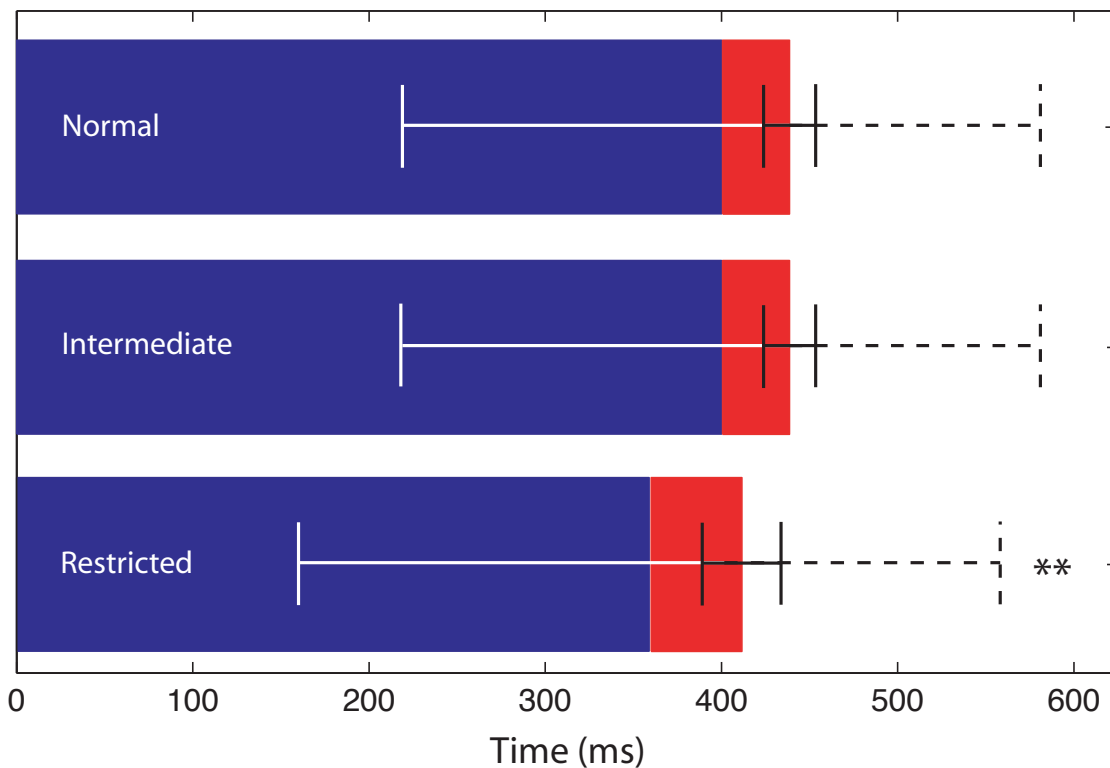

**Figure S3 | Phase duration.** Duration of the arm cocking phase (blue) and acceleration phase (red) for the normal and shoulder brace conditions. Restricted throw timing differed significantly from both normal and intermediate throws.

**Supplementary Note 11. *Effects of the brace on force production*** - Any range of motion (ROM) restriction will necessarily alter the degree to which the ligaments, muscles, and tendons that cross a restricted joint are stretched. In the case of the shoulder brace used in our experiments, this restriction was intended for precisely this purpose. We have argued that the performance reductions that accompanied our shoulder restriction are largely due to a reduction in elastic energy storage. However, the effects of this brace restriction may not be solely limited to elastic structures. It is possible that by altering the excursion of the internal rotator muscles, that these muscles may have achieved less optimal sarcomere lengths and thus produced less force. Such an effect could complicate our findings related to elastic energy storage. However, we propose that there are several reasons to believe such muscle effects are minimal and that the brace's effects are largely, although not wholly, confined to more elastic structures.

First, while the brace restriction reduced the external rotation during the restricted trials by an average of  $24^\circ$ , this reduction was entirely within the shoulders' passive ROM. Therefore, the active external rotation of the throwing arm at the beginning of the cocking phase is unimpeded. This "pre-cocking" of the humerus by the external rotator muscles results in stretching of the internal rotator muscles, tendons, and ligaments and presumably an increase in their stiffness<sup>203,204</sup>. This active external rotation should continue until the point where the passive (or minimally active) resistance of the internal rotators, tendons and ligaments equals the active force generated by the external rotators (the active ROM limit). Thus, even before the passive external rotation of the humerus during the cocking phase, the internal rotator muscles have been stretched.

Second, measures of resting sarcomere length in P. major, anterior Deltoid, and Biceps show these muscles are close to optimal length ( $2.8 \mu\text{m}$ <sup>205</sup>) when in anatomical position. Furthermore, comparison of resting muscle length in anatomical position to estimates of optimal muscle length<sup>124,206</sup> for the other internal rotators (Subscapularis, L. dorsi, T. major) suggest that positioning the arm at the beginning of the cocking phase (shoulder abducted, horizontally extended, externally rotated) likely brings these muscles to near optimal lengths as well. Therefore, the force generation potential of these muscles at the active ROM limit should be near peak. This near optimal force production potential of the internal rotators at the active rotational ROM limit is important to our model, providing the counter torque required to oppose the inertial forces acting on the arm during rotation into the passive range. Electromyography studies show that during the late cocking phase (when the arm is being passively externally rotated), the internal rotator muscles are highly active<sup>118,119,182,207</sup>. Such high activation at near optimal muscle length could provide large counter forces to stabilize the internal rotator muscle lengths, oppose the external rotation motion, and enable the tendons/ligaments to stretch and store elastic energy.

Finally, it is worth noting that despite the brace restriction, a mass-corrected estimate of joint power during the restricted condition ( $1162 \pm 994 \text{ W kg}^{-1}$ ) still exceeds even adjusted estimates of peak muscle force by 1.5-3 fold. As our model predicts, this indicates significant amounts of elastic energy storage is still occurring in the restricted condition.



**Supplementary Note 12. Humeral torsion** - Humeral torsion (or retroversion) is a commonly used measure to describe the twisted shape of the humeral shaft. This angle is measured perpendicular to the long axis of the humerus at the intersection of two chords: one that evenly bisects the articular surface of the humeral head, the other connecting the distal epicondyles at the elbow (Figure S4). Previous research has shown torsion differs between human populations<sup>208-211</sup>, between the sexes<sup>208,209,211,212</sup>, and between the dominant and non-dominant arms<sup>208,211,213</sup>. It is known that such differences occur during development<sup>214-217</sup> potentially due to variation in habitual usage of the arm<sup>198,209,218,219</sup> or a muscular imbalance between the shoulder rotator muscle groups<sup>167,217,220,221</sup>. Recent work has shown that throwing athletes have significantly lower torsion in their throwing arm than do non-throwers<sup>198-200,222,223</sup> and that this lower torsion is linked both to shifts in the rotational range of motion (ROM) at the shoulder<sup>199,200,222,223</sup> and to a reduction in shoulder injury risk<sup>198</sup>. Here, we test the hypothesis that lower torsion in the throwing arm enables increased elastic energy storage and thus increases throwing velocity. We estimate humeral torsion in our subjects using measures of the active rotational ROM limits<sup>223</sup>. The performance data reported in the text come from the normal unrestricted throwing condition.

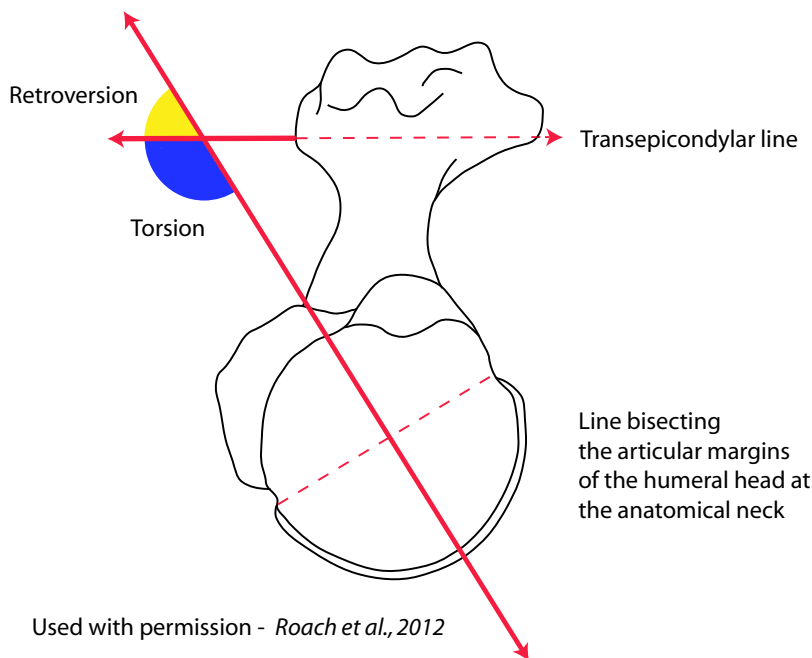

**Figure S4 | Measuring humeral torsion.** Humeral torsion (in blue) is measured at the intersection of the chords defining the orientation of the humeral head proximally and the transepicondylar line distally. In clinical settings, this angle is measured in the opposite direction and is termed humeral retroversion or retrotorsion.

**Supplementary Note 13. *Lethality of hand thrown projectiles*** – In modern sports contexts, hand thrown projectiles rarely cause (or are intended to cause) serious harm. However, despite the use of light, round balls and protective gear such as helmets and significant padding, minor injuries such as contusions, concussions, and bone fractures are common and fatalities sometimes occur<sup>224,225</sup>. Moreover, these modern projectiles differ significantly from the stones, throwing sticks, and untipped wooden spears likely used by early hominins. While the precise effectiveness of these projectiles at causing lethal damage is unknown, there is some indirect evidence that such weapons are able to kill game. For example, there are reports of throwing sticks and boomerangs being used to hunt small animals<sup>81,226,227</sup>. Darwin reports on the effectiveness of rocks thrown by Fuegian foragers at killing birds<sup>1</sup>. Similarly, there are reports of wooden spears being used to kill game as large as wallabies, dugong, and crocodiles<sup>81,228</sup>. Furthermore the presence of untipped wooden spears in both the ethnographic<sup>81,228-234</sup> and fossil records<sup>235</sup> further suggests they must have been effective weapons. While much remains unknown about throwing behavior in human evolution, there is good reason to believe such behavior could have been an effective means of early hunting and may have played an important role in our evolutionary past.

**Supplementary Note 14. Osteological signatures of throwing** – The archaeological record for throwing before the relatively recent appearance of lithic projectile points<sup>236-241</sup> is sparse and controversial<sup>235,238,242-248</sup>. Accordingly, a number of studies have sought to use fossil material to address whether earlier hominins produced high-powered throws<sup>8,10,14,15,249-252</sup>. Contrary to our approach, previous osteological studies have largely focused on asymmetries in anatomical features of the upper body thought to be related to throwing behavior. However, such studies often address only more recent taxa (such as *H. neanderthalensis*) and frequently do not test the validity of proposed functional anatomical hypotheses.

Results from these analyses have been equivocal and problematic. A study of later hominin humeral torsion asymmetry found, with a limited sample, that bilateral asymmetry in torsion angle was lower in Neanderthals than modern humans<sup>15</sup>. The authors suggest that this asymmetry pattern suggests that Neanderthals did not throw. However, it is worth noting that the Neanderthals sampled had lower torsion than most of the modern human groups measured. Our data on humeral torsion and throwing performance suggest that it is not the presence of asymmetries in torsion, but rather the maintenance of lower torsion into adulthood that provides a performance advantage during throwing. Differences in ulnar supinator crest size and asymmetry have also been interpreted as evidence that Neanderthals did not throw<sup>14</sup>. However, the supinator muscles are not involved in generating high-speed throws and accordingly show low activity during all phases of the throw<sup>253</sup>. Furthermore, no asymmetries in supinator index were found in any group studied. The variable presence of a supinator crest in males across a number of diverse hominin taxa suggests this trait is a signature of skeletal robusticity rather than throwing behavior<sup>254-256</sup>. Analyses of humeral cross-sectional geometry and glenoid index have also been used to suggest that Neanderthals lacked the ability to throw effectively<sup>14,15,257,258</sup>. While the performance or injury reduction benefits of both features are unknown and untested, significant difference between Neanderthals and modern humans were found. However, it is worth noting that in both cases when non-size corrected values are analyzed, Neanderthals have absolutely more robust humeri and glenoid fossae. These data suggests that Neanderthals might actually be better adapted to withstand the forces generated during throwing than modern humans. Churchill and Rhodes<sup>259</sup> point out that Neanderthals have significantly longer olecranon processes than do modern humans, which would increase the mechanical advantage of the triceps, but potentially also reduce elbow extension speed during throwing. However, it is worth noting that our data and that from a number of other studies of throwing biomechanics<sup>260-262</sup> show that the moment at the elbow during rapid elbow extension is antagonistic and in fact acts to slow extension. This suggests that a minor increase in olecranon length would have little effect on throwing performance. Thus far, the most useful osteological marker of throwing behavior is the unilateral presence of enthesopathies on the medial epicondyle of the distal humerus of the throwing arm<sup>10,263-268</sup>. However, it is worth noting that this bone stress indicator is not present in all throwers and further work is needed to determine whether throwing alone is responsible for creating these bone lesions. Furthermore, these enthesopathies may be of limited utility in addressing whether earlier hominins threw, as excellent preservation of the bone surface on both humeri is required and rarely found.

**Supplementary Note 15. Clavicle length in *Homo erectus*** - Previous research reconstructing the hominin shoulder has suggested that early *H. erectus* fossils have relatively short clavicles when standardized by humeral length<sup>249</sup>. Given that the clavicle is the only bony attachment of the shoulder girdle to the torso, clavicle length is inferred to affect scapular positioning and thus range of motion at the shoulder<sup>249</sup>. Using the claviculohumeral ratio (clavicle length/humeral length\*100) from the KNM WT 15000 and LB1 fossils, Larson<sup>249</sup> reconstructs early *H. erectus* as having novel, intermediate shoulder morphology with low, very anteriorly positioned scapula and suggests that as a result early *H. erectus* may have had compromising throwing ability.

However, while the KNM WT 15000 claviculohumeral ratio (40.9) is low for modern humans, it does fall within the measured range of normal variation seen in East African populations today<sup>249</sup>. Additionally, fossil clavicles from the early *H. erectus* site of Dmanisi show reconstructed claviculohumeral length ratios squarely within the modern human range (Adult male – 46.5L, 46R; juvenile – 43.7)<sup>269</sup>. Given that both the Dmanisi and Nariokotome clavicle fossils are incomplete, assessing the accuracy of the length reconstruction methods used is important to resolve this discrepancy. However, these methods are not reported in the Dmanisi analysis. Further research is required to address this interesting discrepancy.

Finally, while standardizing clavicle length using the humerus has been shown to be a useful method to correct for species-specific differences in body mass<sup>249,270</sup>, it is unclear whether the claviculohumeral ratio is useful for reconstructing shoulder position. Chimpanzees for example have low claviculohumeral ratios and yet have *dorsally* positioned, cranially oriented scapula. This dorsal shoulder position is not a function of the length of the clavicle relative to body mass, but instead derives from the length of the clavicle relative to the breadth of the superior portion of the ribcage, which is evolving independently of body mass<sup>25</sup>. Recent work investigating clavicular length in apes suggests that when chimpanzee clavicles are normalized to thorax width they fall closer to the rest of the apes in having a relatively elongated clavicle relative to monkeys<sup>271</sup>. Such a thorax width standardization better accounts for the shoulder positioning seen in chimpanzees and humans. In sum, better data are needed to determine how clavicle length/shape, as well as thorax width/shape, relate to shoulder positioning in hominins, and existing data on clavicle length in *H. erectus* do not preclude high-speed throwing.

**Supplementary Note 16. Glenoid orientation as a throwing adaptation** – The “relaxation” or caudal rotation of the scapula in *H. erectus* likely had significant effects on many behaviors. It is possible that this modification to shoulder position may be an adaptation for throwing, because it would result in large increases in throwing performance while having relatively minor or even negative effects on the performance of other important behaviors. For instance, laterally oriented shoulders likely positioned the glenohumeral joint further inferiorly on the thorax, resulting in a wider shoulder breadth that would reduce the mechanical advantage of the shoulder muscles during climbing. In addition, a more relaxed shoulder would result in a lateral reorientation of the *P. major* muscle, removing any useful flexion contribution of this muscle during stick digging. The effects of shoulder position on knapping are more difficult to address. The power requirements of stone tool manufacture are probably much lower than during high-speed throwing and the muscle most significantly affected by a change in shoulder positioning, *P. major*, is likely minimally active during knapping. In this regard, a lower shoulder would have little effect. However, Larson<sup>249</sup> notes that a laterally oriented glenoid in combination with very low torsion in *H. erectus* (below most modern human values, including most throwing athletes) could result in reduced range of motion for manipulative tasks such as knapping or tool use. This problem, in combination with potentially short clavicles relative to humerus length, have led Larson to propose that the shoulder in *H. erectus* was more anteriorly positioned. To address this hypothesis, further data on tool manufacture and use are needed to test whether shifts in shoulder morphology alter performance or result in compensatory motions. The only other context in which a low laterally oriented shoulder has been suggested to improve performance is during running<sup>25</sup>. Bramble and Lieberman suggest that shifts in shoulder position represent a decoupling of the head and shoulders and help to increase gaze stability during running. However, it is unclear to what extent decoupling of the shoulder from the head is related to lower, wider shoulders, and the body has additional mechanisms to insulate the head from jarring motions<sup>272,273</sup>. In sum, much additional research is needed to quantify the performance effects of a laterally oriented shoulder on many diverse activities, but there is reason to hypothesize that shifts in shoulder position have important performance effects during throwing and may represent an adaptation for this behavior.

**Supplementary Note 17. *Pre-enrollment performance task & data exclusion criteria*** – Collegiate age male subjects with no current torso or forelimb injuries were recruited for this study. All subjects were required to pass an initial performance task prior to enrollment. Each potential subject was given 5 tries to hit a 1m x 1m target with a baseball from 10 meters away at a minimum speed of 22.35 m/sec (50 mph). Twenty-five subjects successfully completed the task and were enrolled in the study (one subject subsequently removed himself prior to data collection). Of the 24 total subjects, 3 failed to achieve any throw of at least 22.35 m/sec during the full data collection and were excluded from the study. One further subject was removed from normal vs. restricted analysis due to an abnormal response to the shoulder restricted condition, rendering him an outlier in all analyzed data. The final sample size for all conditions is 20 subjects.

**Supplementary Note 18. Kinematics** – Twenty-one 25mm passive reflective markers were used to define the torso, arm, forearm and hand (Figure S5). The markers were placed on bony landmarks using both double-sided toupee tape and cloth medical tape. The torso was defined with 5 markers (C7, C7 prominens; ThrowAcro, throwing side acromion; ContraAcro, contralateral side acromion; ThrowHip, throwing side greater trochanter of the femur; and ContraHip, contralateral side greater trochanter of the femur). A rigid cluster containing 4 markers was also placed on the back between the scapula on trials where no brace restricted its application (TorsoSup, superior; TorsoInf, inferior; TorsoThrow, throwing side; and TorsoContra, contralateral side). Two markers were placed on the scapular spine (ScapLat, lateral; and ScapMed, medial). The arm was defined using a functionally defined shoulder joint (see Supplementary Note 22) and two distal markers (ElbLat, lateral humeral epicondyle; and ElbMed, medial humeral epicondyle). On some trials a second rigid cluster was applied to the dorsal side of the arm (ArmProx, proximal; ArmDist, distal; ArmMed, medial; and ArmLat, lateral). The forearm was defined using the calculated midpoint between ElbLat and ElbMed proximally and two markers distally (WriLat, radial styloid; and WriMed, ulnar styloid). The hand was defined again using the calculated midpoint of the wrist markers as well as two distal markers (MC2, distal end of the 2<sup>nd</sup> metacarpal; and MC5, distal end of the 5<sup>th</sup> metacarpal). All markers were identified using Vicon Nexus v1.7.1 software.

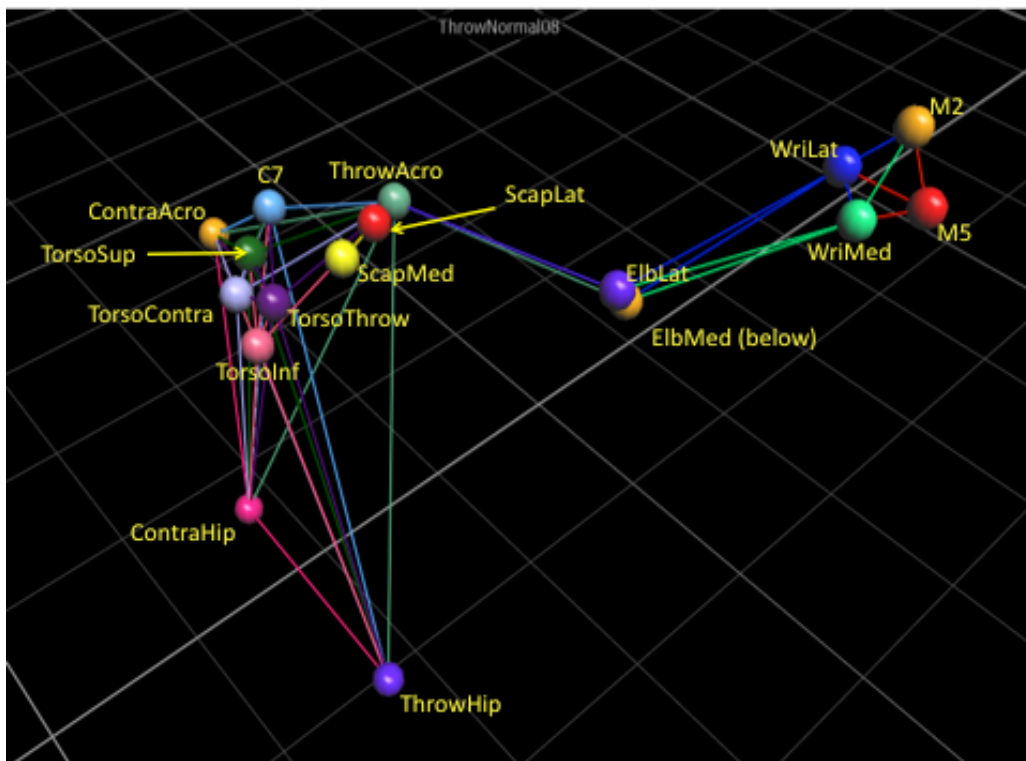

**Figure S5 | Reflective markers on a subject at ball release.** Note: there is no arm cluster in this trial.

**Supplementary Note 19. *Experimental conditions*** – All subjects performed both “slow” and “fast” throws in each of 5 conditions. During slow throws the subject was instructed to make a comfortable throw with no consideration of speed. During fast throws the subject was instructed to throw as fast as he felt comfortable throwing. The conditions were normal unrestricted kinematics and four brace restricted conditions (clavicular elevation, torso immobilization, shoulder rotation, and wrist extension). Condition order was randomized across subjects. The brace restrictions used commercially available therapeutic braces to limit range of motion at a specific joint. All brace conditions (except for torso immobilization) also included an intermediate sub-condition in which the brace was worn but no restriction was applied. During loaded brace conditions, subjects were instructed to attempt their normal throwing motion. In this paper, only data from the normal unrestricted and shoulder rotation restriction (Donjoy Shoulder Stabilizer - Donjoy Inc, Vista, CA) are used.



**Supplementary Note 20. Filtering** – Residual analysis was conducted following Winter<sup>274</sup> on throwing trials from 5 randomly chosen subjects using a custom MATLAB script. The residual was calculated for 2<sup>nd</sup>, 4<sup>th</sup> and 6<sup>th</sup> order Butterworth lowpass filters with the cutoff frequency iterated between 1Hz and the Nyquist frequency of the data (500Hz). The residual was calculated for the ThrowHip, ThrowAcro, ElbLat, WristLat and MC2 markers using the formula;

Equation S1: 
$$R(f_c) = \sqrt{\frac{1}{N} \sum_{i=1}^N (X_i - \hat{X}_i)^2} \quad (\text{Eq. S1})$$

where  $R$  is the residual in meters,  $f_c$  is the cutoff frequency,  $X_i$  is the raw data of the  $i^{\text{th}}$  sample, and  $\hat{X}_i$  is the filtered data of the  $i^{\text{th}}$  sample. The full residual analysis was conducted twice; once with the full throwing trial (Figure S6) and once using only the critical period from the initiation of internal rotation of the humerus to ball release (Figure S7). Cutoff frequencies were manually chosen following Winter<sup>274</sup>.

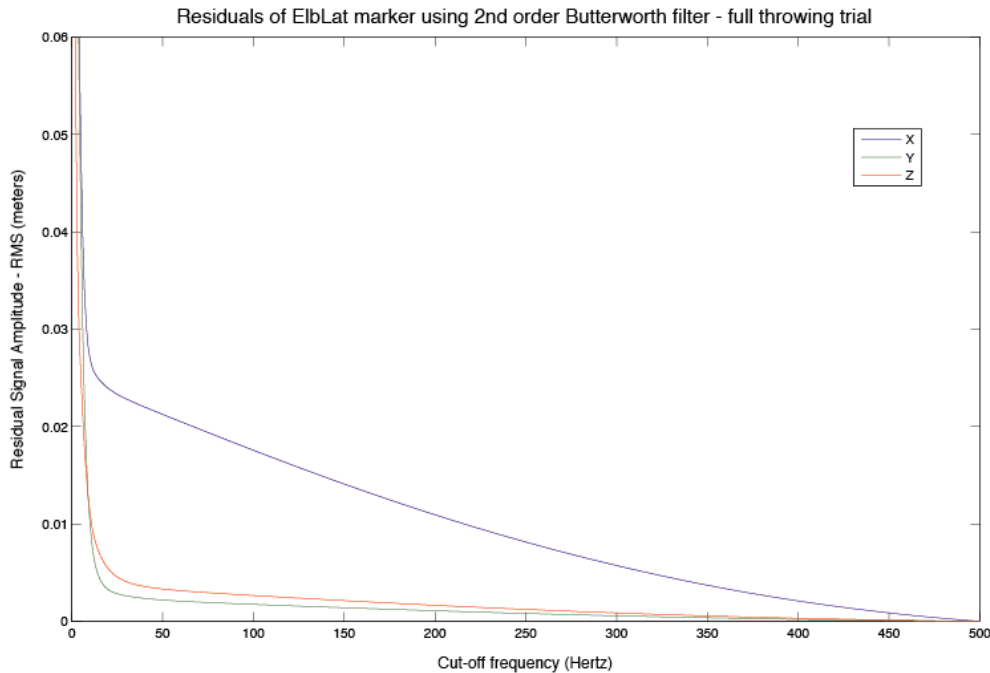

**Figure S6 | Sample residual analysis data from the full trial.** These data show the ElbLat marker data using a 2<sup>nd</sup> order Butterworth filter (Subject 006, trial 8).

A 2<sup>nd</sup> order filter was chosen as the best fit for the data because it consistently returned the lowest actual residuals across all markers. Full trial and critical period cutoff frequency means were statistically different ( $p < 0.05$ ) using a matched pairs t-test (Table S4). The mean was calculated from the X, Y, and Z residuals from each marker and then again from all markers (all marker XYZ mean: 17.3 Hz – full data set; 36.7 Hz – critical period). For data processing, we split the difference between the full data period and the

critical period frequencies by using a 25 Hz cutoff frequency. As a final check on the sensitivity of our analyses, we added random noise (2mm width, zero mean) to all markers from a single subject's raw, unfiltered data. After filtering, no significant differences were detected in any kinetic measures.

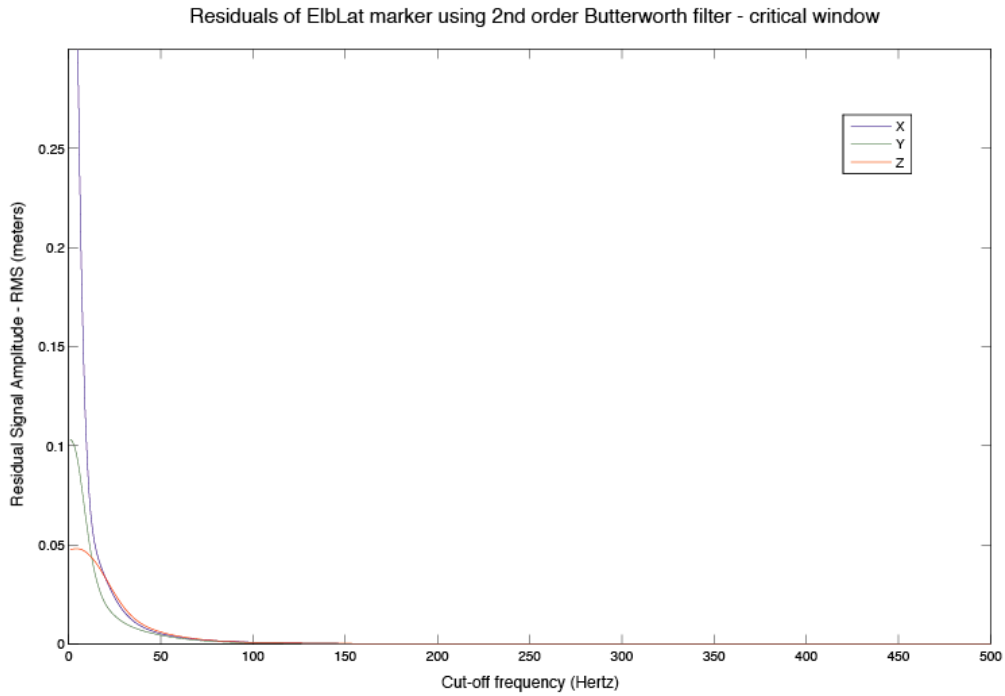

**Figure S7 | Sample residual analysis data from the critical period.** These data show the ElbLat marker data using a 2<sup>nd</sup> order Butterworth filter (Subject 006, trial 8).

Supplementary Table S4 - Cutoff frequency data (Hz)  
- 2nd order Butterworth filter

| <i>Marker</i>    | <i>Data set</i> | <i>X</i>   | <i>Y</i>   | <i>Z</i>  | <i>Mean XYZ</i> |
|------------------|-----------------|------------|------------|-----------|-----------------|
| <b>ThrowHip</b>  | <i>full</i>     | 14.8(4.8)  | 12.2(3)    | 10.2(3.2) | 12.4(3.7)       |
|                  | <i>critical</i> | 41(11.5)   | 35(7.8)    | 37.4(6.8) | 37.8(8.7)       |
| <b>ThrowAcro</b> | <i>full</i>     | 21(12.9)   | 12.8(4.4)  | 18(11.3)  | 17.3(9.5)       |
|                  | <i>critical</i> | 67.8(46.5) | 58.4(45.7) | 26.6(9.7) | 50.4(34)        |
| <b>ElbLat</b>    | <i>full</i>     | 18.8(8.9)  | 15.2(3)    | 14.8(4.8) | 16.3(5.6)       |
|                  | <i>critical</i> | 35.6(8.4)  | 34.2(8.5)  | 36.8(7.3) | 35.5(8.1)       |
| <b>WristLat</b>  | <i>full</i>     | 30.2(15.7) | 15.8(5)    | 13.2(1.6) | 19.7(7.4)       |
|                  | <i>critical</i> | 41.8(11.9) | 25(4.7)    | 25.2(4.3) | 30.7(7)         |
| <b>MC2</b>       | <i>full</i>     | 34.4(10.9) | 16(4.4)    | 12.4(1.8) | 17.1(5.7)       |
|                  | <i>critical</i> | 25.2(9.4)  | 24.8(8.4)  | 24.2(7.5) | 25.3(8.4)       |

**Table S4 | Mean cutoff frequencies (and standard deviations).** Data from 5 subjects using a 2<sup>nd</sup> order Butterworth filter.

**Supplementary Note 21. *Throwing phase standardization*** – Differences in timing between throws are controlled for in the kinematic and kinetic data by assigning portions of the motion to several standardized phases: windup, stride, arm-cocking, acceleration, and deceleration<sup>275</sup>, of which we focus here on arm-cocking and acceleration. Arm cocking is defined from the moment of leading foot contact with the ground at the end of stride (STR) to the maximum external rotation (MER) of the shoulder. Acceleration is defined from MER to the moment of release (REL). STR was defined using the minimum point of mid-pelvis linear velocity. MER was defined as the shoulder rotation angular velocity zero point following STR. Data from the entire internal rotation motion (including the full acceleration and deceleration phases) were further calculated from MER to DECEL, defined as the shoulder rotation angular velocity zero point following REL.

Because these phases often differ in duration between throws, further standardization is required in order to calculate mean values and variances for all parameters. Accordingly, all joint angles, angular velocities, torques and power values were processed in MATLAB by interpolating each phase 1000 fold and subsequently down sampling each throw to a set length. The acceleration phase was down sampled to 100 data points and the arm-cocking phase to 894 points (in keeping with the mean arm cocking/acceleration duration ratio). Note that the different throwing conditions did vary in this ratio (see Supplementary Note 10), but that in order to achieve comparable data between conditions the mean 8.94:1 ratio was used for all conditions.

**Supplementary Note 22. Kinetics** – The kinetic model was created using C-Motion Visual3D software. Segment definitions and rotational axes are described in Table S5. All segment masses, centers of mass, and radii of gyration were taken directly from Dempster<sup>276</sup>. A number of the markers used to define and track segments are virtual calculated markers. The markers midHip and midWrist represent the calculated midpoint between the hip and wrist markers respectively. The FuncSho marker is calculated as a functional joint from a movement trial. In this movement trial, the subject keeps his torso still, the arm is abducted 90 degrees and the elbow is fully extended. The subject then proceeds to slowly circumduct the arm keeping the elbow straight. The motion is tracked as two temporary segments (torso – ThrowAcro, ContraAcro, C7; arm – ThrowAcro, ElbMed, ElbLat). An optimization was performed to find the functional joint center between the two segments with the lowest residual. A limitation of our model is that the shoulder is treated as a single joint, when in reality two joints are present (glenohumeral and scapulothoracic). This is common practice when modeling the shoulder (eg. <sup>111,164,277-280</sup>) due to the difficulty of accurately tracking scapular motion during high-speed movements<sup>100,101</sup>. This simplified shoulder model does not affect our analysis as our inverse dynamics calculations are computed about the proximal end of the distal segment (eg. for the shoulder – the humeral markers are used).

The final calculated marker (RFA80) is both a marker and a joint (Figure S8). This marker is calculated as lying 80% of the distance towards the wrist along the chord from the calculated midElbow and midWrist markers. The marker was created to establish a virtual, independent segment in the forearm that allows for accurate measures of pro/supination and solves a tracking problem in the elbow. Because the humeroulnar and humeroradial joints have different joint centers, defining a single forearm segment requires choosing a joint center that accurately represents one forearm motion but the other poorly or represents both poorly. This is evident when a single forearm segment model is loaded into the data as the forearm tracks very poorly at the elbow. To solve this problem, we created a two-segment forearm using the RFA80 marker. The proximal segment, ForearmUpper, contains 80% of the mass and length of the forearm, while the distal segment, ForearmLower, contains 20% of the mass and length. Due to the way both segments are defined, the motion at the joint between these two segments should be confined to movement around the Z axis.

Joint angle data from ForearmLower shows that this is largely the case, although there are minor angular changes around the X and Y axes (<6 degrees, approximately 4% of total angular motion at the joint). These minor movements likely represent slight deviations in the axis of pro/supination away from the estimated axis. The definition of these segments also prevents any problems with calculated moments as the lack of flex/extension motion at the ForearmPS joint and pro/supination motion at the elbow joint create non-independent masses for the entire forearm. The use of a two-segment forearm also resolves the model-tracking problem in the elbow.

| Supplementary Table S5 - Segment Definitions |          |                                                                            |                                          |                                                                                 |
|----------------------------------------------|----------|----------------------------------------------------------------------------|------------------------------------------|---------------------------------------------------------------------------------|
| Segment                                      | Geometry | Defining Markers                                                           | Tracking Markers                         | Axes                                                                            |
| Thorax/Pelvis                                | Cylinder | Proximal:<br>ThrowHip,<br>ContraHip<br>Distal:<br>ThrowAcro,<br>ContraAcro | midHip (calc)<br>ThrowAcro<br>ContraAcro | X: axial<br>flex/extension<br>Y: lateral<br>flex/extension<br>Z: axial rotation |
| Arm                                          | Cone     | Proximal:<br>FuncSho (calc),<br>ThrowAcro<br>Distal: ElbMed,<br>ElbLat     | FuncSho (calc)<br>ElbMed<br>EldLat       | X: flex/extension<br>Y: ab/adduction<br>Z: int/external<br>rotation             |
| ForearmUpper                                 | Cone     | Proximal:<br>ElbMed, ElbLat<br>Distal: RFA80<br>(calc)                     | ElbMed<br>ElbLat<br>RFA80 (calc)         | X: flex/extension                                                               |
| ForearmLower                                 | Cone     | Proximal:<br>RFA80 (calc)<br>Distal: WriMed,<br>WriLat                     | RFA80 (calc)<br>WriMed<br>WriLat         | Z: pro/supination                                                               |
| Hand                                         | Sphere   | Proximal:<br>WriMed, WriLat<br>Distal: MC5,<br>MC2                         | midWrist (calc)<br>MC5<br>MC2            | X: flex/extension<br>Y: ulnar/radial<br>deviation                               |
| Ball                                         | Sphere   | Single marker:<br>Ball Prox (calc)                                         | midWrist (calc)<br>MC5<br>MC2            | No independent<br>motion                                                        |

**Table S5 | Segment parameters using in the kinetic model.** Segment length and diameter is obtained using the defining marker sets. Segmental movements are recorded using the tracking markers around the defined axes.

The most distal segment in the kinetic model is the ball. The ball segment is defined as a calculated marker, Ball, which is placed 130% of the distance along the chord from the WriLat to MC2 marker and 20% of the distance along the chord between the MC2 and MC5 markers. This places the ball between and slightly distal to the 2<sup>nd</sup> and 3<sup>rd</sup> metacarpal heads (a common placement for a standard split finger throw). The ball was given the appropriate mass (144g) and radius (3.68cm) of a standard baseball. The

ball segment was tracked using the same markers as the hand segment and therefore is non-independent. In all kinetic data from after the moment of release, the mass of the Ball segment is dropped to zero.

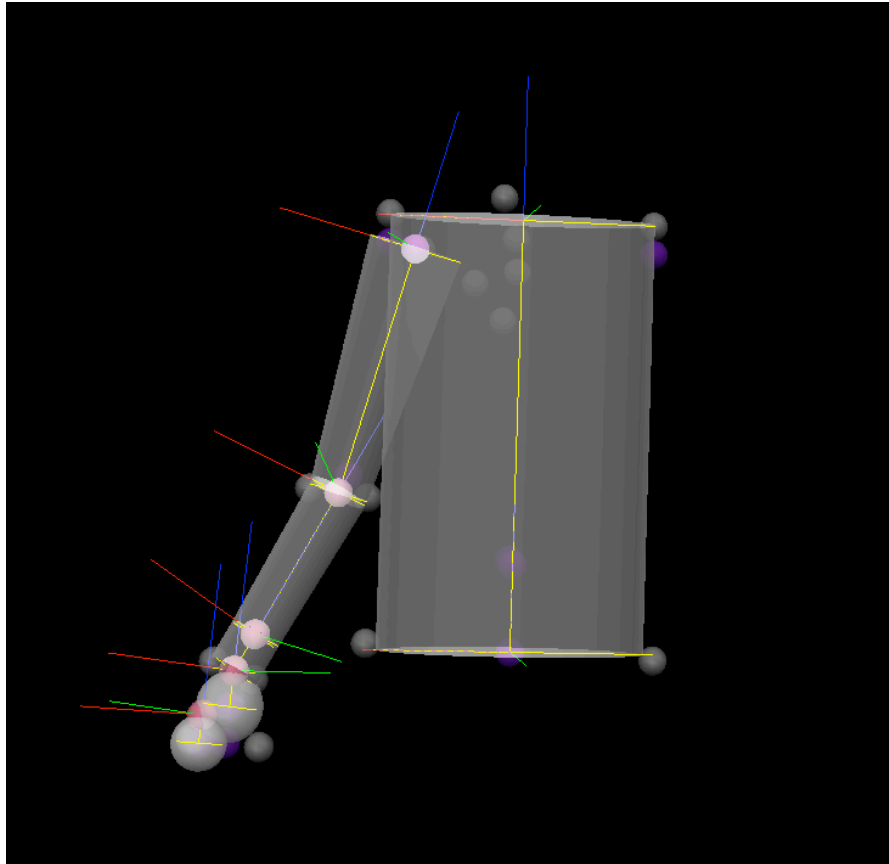

**Figure S8 | Visual3D kinetic model showing the segments used in the inverse dynamics analysis.** Note the distal ball segment as well as the location of the RFA80 and functional shoulder joints.

All defined joints in the kinetic model are described in Table S6. Note that all joint angles and velocities are defined using a X,Y,Z Cardan sequence of rotations and all joint measures are resolved relative to the proximal segment with the exception of the torso/pelvis, which is necessarily resolved relative to the lab global coordinate system, and the shoulder, which is resolved relative to its own axis to bring angular velocities and related measures in line with previously published data<sup>277,278</sup>.

Supplementary Table S6 - Joint Definitions

| <b>Joint</b>     | <b>Segment</b> | <b>Reference Segment</b> | <b>Resolution Coordinate System</b> | <b>Cardan Sequence for Joint Angles</b> |
|------------------|----------------|--------------------------|-------------------------------------|-----------------------------------------|
| <i>Torso</i>     | Thorax/Pelvis  | Lab                      | Lab                                 | X,Y,Z                                   |
| <i>Shoulder</i>  | Arm            | Thorax/Pelvis            | Arm                                 | X,Y,Z                                   |
| <i>Elbow</i>     | ForearmUpper   | Arm                      | Arm                                 | X,Y,Z                                   |
| <i>ForearmPS</i> | ForearmLower   | ForearmUpper             | ForearmUpper                        | X,Y,Z                                   |
| <i>Wrist</i>     | Hand           | ForearmLower             | ForearmLower                        | X,Y,Z                                   |

**Table S6 | Joint parameters used in the kinetic model.** The Cardan sequence is the series of rotations used to define both the joint Euler angles and the joint velocity, which is calculated using the instantaneous axis of rotation and not the first derivative of the Euler angles.



**Supplementary Note 23. Comparison to previous estimates of power –**

Although previous studies have not published data on power generation during throwing, we can directly compare the two measures from which mechanical power is derived: angular velocity and torque. Peak angular velocity for shoulder internal rotation in our subjects was  $4290 \pm 1127$  °/sec, which is comparable to or below peak values reported elsewhere<sup>111,277,278,281</sup>. Peak shoulder rotation torque in our sample was  $206 \pm 42$  N/m. These torques fall squarely in the middle of previously reported values, with some previously published values being higher<sup>278</sup>, some approximately equivalent<sup>277</sup>, and still others lower<sup>111,282,283</sup>. In the studies that reported lower torques, the filtering procedure was either not described<sup>282</sup> or used a lower, qualitatively chosen filtering cut-off frequency (13.4 Hz)<sup>111,283</sup>. Our residual analyses suggest this low cutoff frequency will underestimate joint accelerations affecting the resulting torques, especially during the critical acceleration phase.

## Supplementary References

- 1 Darwin, C. *The descent of man, and selection in relation to sex*. (John Murray, 1871).
- 2 DeVore, I. & Lee, R. B. (ed). *Man the hunter*. (Aldine de Gruyter, New York, 1968).
- 3 Darlington, P. J. Group Selection, altruism, reinforcement, and throwing in human evolution. *Proc Natl Acad Sci U S A* **72**, 3748-3752 (1975).
- 4 Calvin, W. H. *The throwing madonna: Essays on the brain*. (Bantam, 1983).
- 5 Calvin, W. H. A stone's throw and its launch window: timing precision and its implications for language and hominid brains. *J Theor Biol* **104**, 121-135 (1983).
- 6 Calvin, W. H. Did throwing stones shape hominid brain Evolution. *Ethol Sociobiol* **3**, 115-124 (1982).
- 7 Isaac, B. Throwing and human evolution. *Afr Archaeol Rev* **5**, 3-17 (1987).
- 8 Fifer, F. The adoption of bipedalism by the hominids: A new hypothesis. *Hum Evol* **2**, 135-147 (1987).
- 9 O'Connell, J. F., Hawkes, K. & Blurton Jones, N. G. Hadza scavenging: Implication for Plio/Pleistocene hominid subsistence. *Curr Anthropol* **29**, 356-363 (1988).
- 10 Knusel, C. The throwing hypothesis and hominid origins. *Human Evolution* **7**, 1-7 (1992).
- 11 Churchill, S. in *Hunting and animal exploitation in the later Palaeolithic and Mesolithic of Eurasia* Vol. 4 (eds G.L. Peterkin, H.M. Bricker, & P. Mellars) (Archaeological Papers of the American Anthropological Association, 1993).
- 12 Bingham, P. M. Human uniqueness: A general theory. *Q Rev Biol* **74**, 133-169 (1999).
- 13 Dunsworth, H., Challis, J. H. & Walker, A. in *Upright Walking* (eds J. L. Franzen, M. Dohler, & S. Moya-Sola) 105-110 (Senckenberg Institute, 2003).
- 14 Churchill, S. E. & Rhodes, J. A. in *The evolution of hominin diets: Integrating approaches to the study of Paleolithic subsistence* (eds J. J. Hublin & M. P. Richards) (Springer, 2009).
- 15 Rhodes, J. A. & Churchill, S. E. Throwing in the Middle and Upper Paleolithic: inferences from an analysis of humeral retroversion. *J Hum Evol* **56**, 1-10 (2009).
- 16 Hopkins, W. D., Russell, J. L. & Schaeffer, J. A. The neural and cognitive correlates of aimed throwing in chimpanzees: a magnetic resonance image and behavioural study on a unique form of social tool use. *Philos Trans R Soc Lond B Biol Sci* **367**, 37-47 (2012).
- 17 Bingham, P. M. Human evolution and human history: A complete theory. *Evol Anthropol* **9**, 248-257 (2000).
- 18 Bingham, P. M. & Souza, J. *Death from a distance and the birth of a humane universe*. (BookSurge, 2009).
- 19 Chapais, B. in *The Oxford handbook of evolutionary family psychology* (eds C. A. Salmon & T. K. Shackelford) 33-50 (Oxford University Press, 2011).
- 20 Dart, R. A. The Osteodontokeratic culture of *Australopithecus prometheus*. *Trans Mus Memoirs* **10** (1957).

- 21 Ardrey, R. *The hunting hypothesis: A personal conclusion concerning the evolutionary nature of man*. (Atheneum, 1976).
- 22 Shipman, P. & Walker, A. The costs of becoming a predator. *J Hum Evol* **18**, 373-392 (1989).
- 23 Aiello, L. C. & Wheeler, P. The expensive-tissue hypothesis: the brain and the digestive system in human and primate evolution. *Curr Anthropol* **36**, 199-221 (1995).
- 24 Milton, K. A hypothesis to explain the role of meat-eating in human evolution. *Evol Anthropol* **8**, 11-21 (1999).
- 25 Bramble, D. M. & Lieberman, D. E. Endurance running and the evolution of *Homo*. *Nature* **432**, 345-352 (2004).
- 26 Semaw, S. *et al.* 2.5-million-year-old stone tools from Gona, Ethiopia. *Nature* **385**, 333-336 (1997).
- 27 Semaw, S. *et al.* 2.6-million-year-old stone tools and associated bones from OGS-6 and OGS-7, Gona, Afar, Ethiopia. *J Hum Evol* **45**, 169-177 (2003).
- 28 Semaw, S. *et al.* Further 2.5-2.6 million year old artifacts, new Plio-Pleistocene archaeological sites and hominid discoveries of 1999 from Gona, Ethiopia. *J Hum Evol* **40**, A20 (2001).
- 29 McPherron, S. P. *et al.* Evidence for stone-tool-assisted consumption of animal tissues before 3.39 million years ago at Dikika, Ethiopia. *Nature* **466**, 857-860 (2010).
- 30 Stanford, C. B. & Bunn, H. T. in *Human Evolution Series* (eds R. L. Ciochon & B. Wood) (Oxford University Press, New York, 2001).
- 31 Braun, D. R. *et al.* Early hominin diet included diverse terrestrial and aquatic animals 1.95 Ma in East Turkana, Kenya. *Proc Natl Acad Sci U S A* **107**, 10002-10007 (2010).
- 32 de Heinzelin, J. *et al.* Environment and behavior of 2.5-million-year-old Bouri hominids. *Science* **284**, 625-629 (1999).
- 33 Dominguez- Rodrigo, M. & Barba, R. A study of cut marks on small-sized carcasses and its application to the study of cut-marked bones from small mammals at the FLK Zinj site. *J Taphon* **3**, 121-134 (2005).
- 34 Binford, L. R. *Bones: Ancient men and modern myths*. (Academic Press, 1981).
- 35 Bunn, H. T. & Kroll, E. M. Systematic butchery by Plio-Pleistocene hominids at Olduvai Gorge, Tanzania. *Curr Anthropol* **27**, 431-452 (1986).
- 36 Shipman, P. Scavenging or hunting in early hominids: theoretical framework and tests. *Am Anthropol* **88**, 27-43 (1986).
- 37 Potts, R. *Early hominid activities at Olduvai*. (Aldine de Gruyter, 1988).
- 38 Blumenshine, R. J. Percussion marks, tooth marks, and experimental determinations of the timing of hominid and carnivore access to long bones at FLK Zinjanthropus, Olduvai Gorge, Tanzania. *J Hum Evol* **29**, 21-51 (1995).
- 39 Dominguez-Rodrigo, M. Meat-eating by early hominids at the FLK 22 Zinjanthropus site, Olduvai Gorge (Tanzania): an experimental approach using cut-mark data. *J Hum Evol* **33**, 669-690 (1997).
- 40 Dominguez- Rodrigo, M. & Pickering, T. R. Early hominid hunting and scavenging: a zooarchaeological review. *Evol Anthropol* **12**, 275-282 (2003).

- 41 Pobiner, B. L., Rogers, M. J., Monahan, C. M. & Harris, J. W. K. New evidence for hominin carcass processing strategies at 1.5 Ma, Koobi Fora, Kenya. *J Hum Evol* **55**, 103-130 (2008).
- 42 Roth, H. L. *The aborigines of Tasmania*. (Kegan Paul, Trench, Trubner and Company, 1890).
- 43 Farbman, N. in *Life Magazine* (images.google.com/hosted/life), New York, (1947).
- 44 Attenborough, D. in *The life of mammals* (ed D. Attenborough) (BBC, 2002).
- 45 Parmentier, R. J. *The sacred remains: myth, history, and polity in Belau*. (University of Chicago Press, 1987).
- 46 Pollard, S. *In unknown China: a record of the observations, adventures and experiences of a pioneer missionary during a prolonged sojourn amongst the wild and unknown Nosu tribe of western China*. (J. B. Lippincott, 1921).
- 47 Clark, W. F. *Population, agriculture and urbanization in the kingdom of Tonga*. (Michigan State University Press, 1975).
- 48 Edgerton, R. B. *Like lions they fought: the Zulu war and the last black empire in South Africa*. (Collier MacMillan, 1988).
- 49 Foster, G. M. *A summary of Yuki culture*. (University of California Press, 1944).
- 50 Gulliver, P. H. A preliminary survey of the Turkana: a report compiled for the government of Kenya. (Rondebosch, Cape Town, 1951).
- 51 Homer. *The Iliad*. (ed R. Lattimore) (University of Chicago Press, 1961).
- 52 Lang, C. (ed) *Epitoma rei militaris*. (Teubner, Leipzig, 1869).
- 53 Murphy, R. F. Intergroup hostility and social cohesion. *Am Anthropol* **59**, 1018-1035 (1959).
- 54 Chagnon, N. A. *Yanomamo: the fierce people*. (Holt, Rinehart and Winston, 1968).
- 55 Uberoi, J. P. *Politics of the kula ring: an analysis of the findings of Bronislaw Malinowski*. (Manchester University Press, 1971).
- 56 Evans-Pritchard, E. E. Zande warfare. *Anthropos* **52**, 239-262 (1957).
- 57 Roscoe, J. *The Bagesu and other tribes of the Uganda Protectorate: the third report of the Mackie ethnological expedition to Central Africa*. (The University Press, 1924).
- 58 Lane-Fox, A. H. in *The evolution of culture and other essays by the late Gen. A. Lane-Fox Pitt-Rivers* (ed J. L. Myres) 89-143 (Clarendon Press, 1868).
- 59 Hooten, E. A. *The ancient inhabitants of the Canary Islands*. (Peabody Museum Press, 1925).
- 60 Wood, J. G. *The uncivilised races, or the natural history of man*. (American Publishing Co., 1870).
- 61 Kolb, M. P. M. *Peter Kolbens Reise an das capo du donne esperance, oder das AfricanishevVorgeburge der guten hofnung: Nebst einer ausfuhrlichen beshreibung desselben, in dreynen theilen abgefasset*. (Peter Conrad Monath, 1719).
- 62 La Perouse, J. F. G. d. *A voyage round the world in the years 1785, 1786, 1787, and 1788*. Vol. 3 (J. Johnson, 1799).
- 63 Griaule, M. *Masques Dogon*. (Institut d'Ethnologie, 1938).

- 64 Hambly, W. D. in *Museum ethnological expedition to West Africa 1929-30* Vol. 21 (ed B. Laufer) (Field Museum of Natural History, Chicago, IL, 1934).
- 65 Glatzer, B. *Nomaden von Gharjistan: Aspekte der wirtschaftlichen, sozialen und politischen organisation nomadischer Durrani-Paschtunen in Nordwestafghanistan*. (Franz Steiner Verlag, 1977).
- 66 Levine, D. N. *Wax and gold: Tradition and innovation in Ethiopian culture*. (University of Chicago Press, 1965).
- 67 McHenry, H. M. Behavioral ecological implications of early hominid body size. *J Hum Evol* **27**, 77-87 (1994).
- 68 McHenry, H. M. Body size and proportions in early hominids. *Am J Phys Anthropol* **87**, 407-431 (1992).
- 69 Plavcan, J. M. Sexual dimorphism in primate evolution. *Yearb Phys Anthropol* **44**, 25-53 (2001).
- 70 Ruff, C. Variation in human body size and shape. *Annu Rev Anthropol* **31**, 211-232 (2002).
- 71 Aiello, L. C. & Key, C. Energetic consequences of being a *Homo erectus* female. *Am J Hum Biol* **14**, 551-565 (2002).
- 72 O'Connell, J. F., Hawkes, K. & Jones, N. G. B. Grandmothering and the evolution of *Homo erectus*. *J of Hum Evol* **36**, 461-485 (1999).
- 73 Wrangham, R., Jones, J. H., Laden, G., Pilbeam, D. & Conklin-Brittain, N. The raw and the stolen: Cooking and the ecology of human origins. *Curr Anthropol* **40**, 567-594 (1999).
- 74 Hawkes, K., O'Connell, J. F. & Jones, N. G. B. Hadza meat sharing. *Evol Hum Behav* **22**, 113-142 (2001).
- 75 Marlowe, F. W. A critical period for provisioning by Hadza men: Implications for pair bonding. *Evol Hum Behav* **24**, 217-229 (2003).
- 76 Kaplan, H., Hill, K., Hawkes, K. & Hurtado, A. M. Food sharing among Ache hunter-gatherers of Eastern Paraguay. *Curr Anthropol* **25**, 113-114 (1984).
- 77 Lovejoy, C. O. The origin of man. *Science* **211**, 341-350 (1981).
- 78 Barton, R. F. *Ifugao economics*. (University of California Press, 1922).
- 79 Conzemius, E. *Ethnographical survey of the Mishkito and Sumu Indians of Honduras and Nicaragua*. (Washington, DC, 1932).
- 80 Dieterlen, G. *Essai sur la religion bambara*. (Paris 1951).
- 81 Hart, C. W. M., Pilling, A. R. & Goodale, J. C. *The Tiwi of North Australia*. (Holt Rinehart and Winston, 1987).
- 82 Merker, M. *Die Masai: Ethnographische monographie eines ostrafrikanischen semitenvolkes* (Dietrich Reimer (Ernst Vohsen), 1910).
- 83 Nimuendaju, C. *The Tukuna*. (University of California Press, 1952).
- 84 Puccioni, N. *Anthropologia e etnografia delle genti della Somalia*. (Nicola Zanichelli, 1936).
- 85 Titiev, M. *Old Oraibi: a study of the Hopi Indians of the Third Mesa*. (Kraus Reprint Company, 1971).
- 86 Campbell, J. *Travels in South Africa undertaken at the request of the Missionary Society*. (Black, Perry, and Hamilton, 1815).
- 87 Tomita, K. The source of food for the Hadzapi tribe - the life of a hunting tribe in East Africa. *Kyoto Univer Afr Stud* **1**, 151-171 (1966).

- 88 McGowan, C. P., Baudinette, R. V., Usherwood, J. R. & Biewener, A. A. The mechanics of jumping versus steady hopping in yellow-footed rock wallabies. *J Exp Biol* **208**, 2741-2751 (2005).
- 89 Lutz, G. J. & Rome, L. C. Built for jumping: the design of the frog muscular system. *Science* **263**, 370-372 (1994).
- 90 Peplowski, M. M. & Marsh, R. L. Work and power output in the hindlimb muscles of Cuban tree frogs *Osteopilus septentrionalis* during jumping. *J Exp Biol* **200**, 2861-2870 (1997).
- 91 Katz, B. The relation between force and speed in muscular contraction. *J Physiol* **96**, 45-64 (1939).
- 92 Harry, J. D., Ward, A. W., Heglund, N. C., Morgan, D. L. & McMahon, T. A. Cross-bridge cycling theories cannot explain high-speed lengthening behavior in frog muscle. *Biophys J* **57**, 201-208 (1990).
- 93 Biewener, A. A. & Blickhan, R. Kangaroo rat locomotion: design for elastic energy storage or acceleration? *J Exp Biol* **140**, 243-255 (1988).
- 94 McMahon, T. A. *Muscles, reflexes, and locomotion*. (Princeton University Press, 1984).
- 95 Wilk, K. E. *et al.* Stretch-shortening drills for the upper extremities: theory and clinical application. *J Orthop Sports Phys Ther* **17**, 225-239 (1993).
- 96 Garner, B. A. & Pandy, M. G. Estimation of musculotendon properties in the human upper limb. *Ann Biomed Eng* **31**, 207-220 (2003).
- 97 Spitzer, V., Ackerman, M. J., Scherzinger, A. L. & Whitlock, D. The visible human male: a technical report. *J Am Med Inform Assoc* **3**, 118-130 (1996).
- 98 Holzbaur, K. R., Murray, W. M., Gold, G. E. & Delp, S. L. Upper limb muscle volumes in adult subjects. *J Biomech* **40**, 742-749 (2007).
- 99 Mendez, J. & Keys, A. Density and composition of mammalian muscle. *Metabolism* **9**, 184-188 (1960).
- 100 Meyer, K. E. *et al.* Three-dimensional scapular kinematics during the throwing motion. *J Appl Biomech* **24**, 24-34 (2008).
- 101 Miyashita, K., Kobayashi, H., Koshida, S. & Urabe, Y. Glenohumeral, scapular, and thoracic angles at maximum shoulder external rotation in throwing. *Am J Sports Med* **38**, 363-368 (2010).
- 102 Fleisig, G. S., Barrentine, S. W., Escamilla, R. F. & Andrews, J. R. Biomechanics of overhand throwing with implications for injuries. *Sports Med* **21**, 421-437 (1996).
- 103 Altchek, D. W. & Dines, D. M. Shoulder injuries in the throwing athlete. *J Am Acad Orthop Surg* **3**, 159-165 (1995).
- 104 Meister, K. Injuries to the shoulder in the throwing athlete. Part two: evaluation/treatment. *Am J Sports Med* **28**, 587-601 (2000).
- 105 Clemente, C. *Gray's anatomy of the human body*. 30th American edn, (Lea & Febiger, 1985).
- 106 Jobe, C. M., Pink, M. M., Jobe, F. W. & Shaffer, B. in *Operative techniques in upper extremity sports injuries* (ed F. W. Jobe) (Mosby, 1996).
- 107 Rodeo, S. A., Suzuki, K., Yamauchi, M., Bhargava, M. & Warren, R. F. Analysis of collagen and elastic fibers in shoulder capsule in patients with shoulder instability. *Am J Sports Med* **26**, 634-643 (1998).

- 108 Snyder, S. J., Karzel, R. P., Del Pizzo, W., Ferkel, R. D. & Friedman, M. J. SLAP lesions of the shoulder. *Arthroscopy* **6**, 274-279 (1990).
- 109 Matava, M. J., Purcell, D. B. & Rudzki, J. R. Partial-thickness rotator cuff tears. *Am J Sports Med* **33**, 1405-1417 (2005).
- 110 Neer, C. S., 2nd. Impingement lesions. *Clin Orthop Relat Res*, 70-77 (1983).
- 111 Fleisig, G. S., Andrews, J. R., Dillman, C. J. & Escamilla, R. F. Kinetics of baseball pitching with implications about injury mechanisms. *Am J Sports Med* **23**, 233-239 (1995).
- 112 Andrews, J. R. & Angelo, R. L. Shoulder arthroscopy for the throwing athlete. *Tech Orthop* **3**, 75-82 (1988).
- 113 Meister, K. Injuries to the shoulder in the throwing athlete. Part one: Biomechanics/pathophysiology/classification of injury. *Am J Sports Med* **28**, 265-275 (2000).
- 114 Jobe, F. W., Kvitne, R. S. & Giangarra, C. E. Shoulder pain in the overhand or throwing athlete: the relationship of anterior instability and rotator cuff impingement. *Orthop Rev* **18**, 963-975 (1989).
- 115 Fleisig, G. S., Dillman, C. J. & Andrews, J. R. Proper mechanics for baseball pitching. *Clin Sport Med* **1**, 151-170 (1989).
- 116 Werner, S. L., Gill, T. J., Murray, T. A., Cook, T. D. & Hawkins, R. J. Relationships between throwing mechanics and shoulder distraction in professional baseball pitchers. *Am J Sports Med* **29**, 354-358 (2001).
- 117 Andrews, J. R., Carson, W. G., Jr. & McLeod, W. D. Glenoid labrum tears related to the long head of the biceps. *Am J Sports Med* **13**, 337-341 (1985).
- 118 Gowan, I. D., Jobe, F. W., Tibone, J. E., Perry, J. & Moynes, D. R. A comparative electromyographic analysis of the shoulder during pitching: Professional versus amateur pitchers. *Am J Sports Med* **15**, 586-590 (1987).
- 119 DiGiovine, N. M., Jobe, F. W., Pink, M. & Perry, J. An electromyography analysis of the upper extremity in pitching. *J Shoulder Elbow Surg* **1**, 15-25 (1992).
- 120 Kelly, B. T., Backus, S. I., Warren, R. F. & Williams, R. J. Electromyographic analysis and phase definition of the overhead football throw. *Am J Sports Med* **30**, 837-844 (2002).
- 121 Biewener, A. A., Konieczynski, D. D. & Baudinette, R. V. In vivo muscle force-length behavior during steady-speed hopping in tammar wallabies. *J Exp Biol* **201**, 1681-1694 (1998).
- 122 Astley, H. C. & Roberts, T. J. Evidence for a vertebrate catapult: elastic energy storage in the plantaris tendon during frog jumping. *Biol Lett* **8**, 386-389 (2012).
- 123 Pollock, C. M. & Shadwick, R. E. Allometry of muscle, tendon, and elastic energy storage capacity in mammals. *Am J Physiol* **266**, R1022-1031 (1994).
- 124 Langenderfer, J., Jerabek, S. A., Thangamani, V. B., Kuhn, J. E. & Hughes, R. E. Musculoskeletal parameters of muscles crossing the shoulder and elbow and the effect of sarcomere length sample size on estimation of optimal muscle length. *Clin Biomech (Bristol, Avon)* **19**, 664-670 (2004).
- 125 Reeves, N. D., Maganaris, C. N. & Narici, M. V. Effect of strength training on human patella tendon mechanical properties of older individuals. *J Physiol* **548**, 971-981 (2003).

- 126 Pang, B. S. & Ying, M. Sonographic measurement of achilles tendons in asymptomatic subjects: variation with age, body height, and dominance of ankle. *J Ultrasound Med* **25**, 1291-1296 (2006).
- 127 Itoi, E., Hsu, H. C., Carmichael, S. W., Morrey, B. F. & An, K. N. Morphology of the torn rotator cuff. *J Anat* **186 (Pt 2)**, 429-434 (1995).
- 128 McGough, R. L., Debski, R. E., Taskiran, E., Fu, F. H. & Woo, S. L. Mechanical properties of the long head of the biceps tendon. *Knee Surg Sports Traumatol Arthrosc* **3**, 226-229 (1996).
- 129 Bigliani, L. U. *et al.* Tensile properties of the inferior glenohumeral ligament. *J Orthop Res* **10**, 187-197 (1992).
- 130 McMahon, P. J. *et al.* The anterior band of the inferior glenohumeral ligament: biomechanical properties from tensile testing in the position of apprehension. *J Shoulder Elbow Surg* **7**, 467-471 (1998).
- 131 Boardman, N. D. *et al.* Tensile properties of the superior glenohumeral and coracohumeral ligaments. *J Shoulder Elbow Surg* **5**, 249-254 (1996).
- 132 Ticker, J. B. *et al.* Inferior glenohumeral ligament: geometric and strain-rate dependent properties. *J Shoulder Elbow Surg* **5**, 269-279 (1996).
- 133 Halder, A., Zobitz, M. E., Schultz, E. & An, K. N. Structural properties of the subscapularis tendon. *J Orthop Res* **18**, 829-834 (2000).
- 134 Noyes, F. R. & Grood, E. S. The strength of the anterior cruciate ligament in humans and Rhesus monkeys. *J Bone Joint Surg Am* **58**, 1074-1082 (1976).
- 135 Wren, T. A., Yerby, S. A., Beaupre, G. S. & Carter, D. R. Mechanical properties of the human achilles tendon. *Clin Biomech (Bristol, Avon)* **16**, 245-251 (2001).
- 136 Butler, D. L., Grood, E. S., Noyes, F. R., Zernicke, R. F. & Brackett, K. Effects of structure and strain measurement technique on the material properties of young human tendons and fascia. *J Biomech* **17**, 579-596 (1984).
- 137 Cavagna, G. A., Komarek, L., Citterio, G. & Margaria, R. Power output of the previously stretched muscle. *Med Sport Basel* **6**, 159-167 (1971).
- 138 Asmussen, E. & Bonde-Petersen, F. Storage of elastic energy in skeletal muscles in man. *Acta Physiol Scand* **91**, 385-392 (1974).
- 139 Komi, P. V. & Bosco, C. Utilization of stored elastic energy in leg extensor muscles by men and women. *Med Sci Sports* **10**, 261-265 (1978).
- 140 Anderson, F. C. & Pandy, M. G. Storage and utilization of elastic strain energy during jumping. *J Biomech* **26**, 1413-1427 (1993).
- 141 Bobbert, M. F., Gerritsen, K. G., Litjens, M. C. & Van Soest, A. J. Why is countermovement jump height greater than squat jump height? *Med Sci Sports Exerc* **28**, 1402-1412 (1996).
- 142 Bobbert, M. F., Mackay, M., Schinkelshoek, D., Huijing, P. A. & van Ingen Schenau, G. J. Biomechanical analysis of drop and countermovement jumps. *Eur J Appl Physiol Occup Physiol* **54**, 566-573 (1986).
- 143 Kubo, K., Kawakami, Y. & Fukunaga, T. Influence of elastic properties of tendon structures on jump performance in humans. *J Appl Physiol* **87**, 2090-2096 (1999).
- 144 Finni, T., Ikegawa, S. & Komi, P. V. Concentric force enhancement during human movement. *Acta Physiol Scand* **173**, 369-377 (2001).
- 145 Bobbert, M. F. & van Ingen Schenau, G. J. Coordination in vertical jumping. *J Biomech* **21**, 249-262 (1988).



- 146 Hakkinen, K. & Komi, P. V. Fatiguability in voluntary and reflex contraction after conditioning of human skeletal muscle. *Electromyography Clin Neurophysiol* **25**, 319-330 (1985).
- 147 Komi, P. V. & Gollhofer, A. Stretch reflex can have an important role in force enhancement during SSC-exercise. *J Appl Biomech* **13**, 451-460 (1997).
- 148 Norman, R. W. & Komi, P. V. Electromechanical delay in skeletal muscle under normal movement conditions. *Acta Physiol Scand* **106**, 241-248 (1979).
- 149 Komi, P. V. Physiological and biomechanical correlates of muscle function: effects of muscle structure and stretch-shortening cycle on force and speed. *Exerc Sport Sci Rev* **12**, 81-121 (1984).
- 150 Komi, P. V. Stretch-shortening cycle: a powerful model to study normal and fatigued muscle. *J Biomech* **33**, 1197-1206 (2000).
- 151 van Ingen Schenau, G. J., Bobbert, M. F. & de Haan, A. Does elastic energy enhance work and efficiency in the stretch-shortening cycle? *J Appl Biomech* **13**, 389-415 (1997).
- 152 Bobbert, M. F. & Casius, L. J. Is the effect of a countermovement on jump height due to active state development? *Med Sci Sports Exerc* **37**, 440-446 (2005).
- 153 Cavagna, G. A., Dusman, B. & Margaria, R. Positive work done by a previously stretched muscle. *J Appl Physiol* **24**, 21-32 (1968).
- 154 Edman, K. A., Elzinga, G. & Noble, M. I. Enhancement of mechanical performance by stretch during tetanic contractions of vertebrate skeletal muscle fibres. *J Physiol* **281**, 139-155 (1978).
- 155 Ettema, G. J., Huijing, P. A. & de Haan, A. The potentiating effect of prestretch on the contractile performance of rat gastrocnemius medialis muscle during subsequent shortening and isometric contractions. *J Exp Biol* **165**, 121-136 (1992).
- 156 Bosco, C., Tarkka, I. & Komi, P. V. Effect of elastic energy and myoelectrical potentiation of triceps surae during stretch-shortening cycle exercise. *Int J Sports Med* **3**, 137-140 (1982).
- 157 Alexander, R. M. & Bennet-Clark, H. C. Storage of elastic strain energy in muscle and other tissues. *Nature* **265**, 114-117 (1977).
- 158 Roberts, T. J., Marsh, R. L., Weyand, P. G. & Taylor, C. R. Muscular force in running turkeys: the economy of minimizing work. *Science* **275**, 1113-1115 (1997).
- 159 Bober, T., Jaskolski, E. & Nowacki, Z. Study of eccentric-concentric contraction of the upper extremity muscles. *J Biomech* **13**, 135-138 (1980).
- 160 Wilson, G. J., Wood, G. A. & Elliott, B. C. Optimal stiffness of series elastic component in a stretch-shorten cycle activity. *J Appl Physiol* **70**, 825-833 (1991).
- 161 Newton, R. U. *et al.* Influence of load and stretch shortening cycle on the kinematics, kinetics, and muscle activation that occurs during explosive upper-body movements. *Eur J Appl Physiol Occup Physiol* **75**, 333-342 (1997).
- 162 Elliott, B. C., Baxter, K. G. & Besier, T. F. Internal rotation of the upper-arm segment during a stretch-shorten cycle movement. *J Appl Biomech* **15**, 381-395 (1999).
- 163 Cronin, J. B., McNair, P. J. & Marshall, R. N. The role of maximal strength and load on initial power production. *Med Sci Sports Exerc* **32**, 1763-1769 (2000).

- 164 Tauchi, K., Kubo, Y., Byun, K. O. & Takamatsu, K. A mechanism for power output of the upper limbs during overhead throw with stretch-shortening cycle. *Int J Sport Health Sci* **3**, 286-295 (2005).
- 165 van Ingen Schenau, G. J. An alternative view of the concept of utilization of elastic energy in human movement. *Hum Mov Sci* **3**, 310-306 (1984).
- 166 Mero, A., Komi, P. V., Korjus, T., Navarro, E. & Gregor, R. J. Body segment contributions to javelin throwing during final thrust phases. *J Appl Biomech* **10**, 166-177 (1994).
- 167 Wilk, K. E., Andrews, J. R., Arrigo, C. A., Keirns, M. A. & Erber, D. J. The strength characteristics of internal and external rotator muscles in professional baseball pitchers. *Am J Sports Med* **21**, 61-66 (1993).
- 168 Walcott, S. *Understanding movement: a molecular perspective*. PhD thesis, Cornell University, (2006).
- 169 Chowdhary, A. G. & Challis, J. H. The biomechanics of an overarm throwing task: a simulation model examination of optimal timing of muscle activations. *J Theor Biol* **211**, 39-53 (2001).
- 170 Herring, R. M. & Chapman, A. E. Effects of changes in segmental values and timing of both torque and torque reversal in simulated throws. *J Biomech* **25**, 1173-1184 (1992).
- 171 Goodall, J. *The chimpanzees of Gombe: Patterns of behavior*. (Harvard University Press, 1986).
- 172 Goodall, J. Tool-using and aimed throwing in a community of free-living chimpanzees. *Nature* **201**, 1264-1266 (1964).
- 173 Kohler, W. *The mentality of apes*. (Harcourt and Brace, 1925).
- 174 Sugiyama, Y. & Koman, J. Tool-using and making behavior in wild chimpanzees at Bossou, Guinea. *Primates* **20**, 513-524 (1979).
- 175 White, T. D. *et al.* *Ardipithecus ramidus* and the paleobiology of early hominids. *Science* **326**, 75-86 (2009).
- 176 Brunet, M. *et al.* A new hominid from the Upper Miocene of Chad, Central Africa. *Nature* **418**, 145-151 (2002).
- 177 Pickford, M., Senut, B., Gommery, D. & Treil, J. Bipedalism in *Orrorin tugenensis* revealed by its femora. *C.R. Paleovol* **1**, 1-13 (2002).
- 178 Wrangham, R. & Pilbeam, D. in *All apes great and small*, Vol. I *African apes* (ed B.M.F. Galdikas, Briggs, N.E., Sheeran, L.K., Shapiro, G.L. and Goodall, J.) 5-17 (Kluwer Academics/Plenum Publishers, 2001).
- 179 Sayers, K. & Lovejoy, C. O. The chimpanzee has no clothes: A critical examination of Pan troglodytes in models of human evolution. *Curr Anthropol* **49**, 87-114 (2008).
- 180 Zihlmann, A. in *Great ape societies* (ed W.C. McGrew, Marchant, L.F., and Nishida, T.) 293-304 (Cambridge University Press, 1996).
- 181 Fleisig, G. S. *et al.* Kinematic and kinetic comparison between baseball pitching and football passing. *J Appl Biomech* **12**, 207-224 (1996).
- 182 Escamilla, R. F. & Andrews, J. R. Shoulder muscle recruitment patterns and related biomechanics during upper extremity sports. *Sports Med* **39**, 569-590 (2009).

- 183 Kelly, B. T., Barnes, R. P., Powell, J. W. & Warren, R. F. Shoulder injuries to  
quarterbacks in the national football league. *Am J Sports Med* **32**, 328-331 (2004).
- 184 Wagner, H., Buchecker, M., von Duvillard, S. P. & Muller, E. Kinematic  
comparison of team handball throwing with two different arm positions. *Int J  
Sports Physiol Perform* **5**, 469-483 (2010).
- 185 van den Tillaar, R. & Ettema, G. Is there a proximal-to-distal sequence in overarm  
throwing in team handball? *J Sports Sci* **27**, 949-955 (2009).
- 186 van den Tillaar, R. & Ettema, G. A three-dimensional analysis of overarm  
throwing in experienced handball players. *J Appl Biomech* **23**, 12-19 (2007).
- 187 Liu, H., Leigh, S. & Yu, B. Sequences of upper and lower extremity motions in  
javelin throwing. *J Sports Sci* **28**, 1459-1467 (2010).
- 188 Best, R. J., Bartlett, R. M. & Morriss, C. J. A three-dimensional analysis of  
javelin throwing technique. *J Sports Sci* **11**, 315-328 (1993).
- 189 Morriss, C. & Bartlett, R. Biomechanical factors critical for performance in the  
men's javelin throw. *Sports Med* **21**, 438-446 (1996).
- 190 Atwater, A. E. Biomechanics of overarm throwing movements and of throwing  
injuries. *Exerc Sport Sci Rev* **7**, 43-85 (1979).
- 191 Chagneau, F., Delamarche, P. & Levasseur, M. Stroboscopic computerized  
determination of humeral rotation in overarm throwing. *Br J Sports Med* **26**, 59-  
62 (1992).
- 192 Fradet, L., Kulpa, R., Multon, F. & Delamarche, P. in *International symposium on  
biomechanics in sports*. (ed K E Gianikellis) 119-122 (ISBS).
- 193 Alexander, R. M. Optimum timing of muscle activation for simple models of  
throwing. *J Theor Biol* **150**, 349-372 (1991).
- 194 Coh, M., Stuhec, S. & Supej, M. Comparative biomechanical analysis of the  
rotational shot put technique. *Collegium Antropol* **32**, 249-256 (2008).
- 195 Hughes, S. S. Getting to the point: Evolutionary change in prehistoric weaponry. *J  
Archaeol Method Th* **5**, 345-408 (1998).
- 196 Young, R. W. Evolution of the human hand: the role of throwing and clubbing. *J  
Anat* **202**, 165-174 (2003).
- 197 Wolfe, S. W., Crisco, J. J., Orr, C. M. & Marzke, M. W. The dart-throwing  
motion of the wrist: is it unique to humans? *J Hand Surg Am* **31**, 1429-1437  
(2006).
- 198 Pieper, H. G. Humeral torsion in the throwing arm of handball players. *Am J  
Sports Med* **26**, 247-253 (1998).
- 199 Reagan, K. M. *et al.* Humeral retroversion and its relationship to glenohumeral  
rotation in the shoulder of college baseball players. *Am J Sports Med* **30**, 354-360  
(2002).
- 200 Osbahr, D. C., Cannon, D. L. & Speer, K. P. Retroversion of the humerus in the  
throwing shoulder of college baseball pitchers. *Am J Sports Med* **30**, 347-353  
(2002).
- 201 Herrington, L. Glenohumeral joint: internal and external rotation range of motion  
in javelin throwers. *Br J Sports Med* **32**, 226-228 (1998).
- 202 Crockett, H. C. *et al.* Osseous adaptation and range of motion at the glenohumeral  
joint in professional baseball pitchers. *Am J Sports Med* **30**, 20-26 (2002).

- 203 Brinckmann, P., Frobin, W. & Leivseth, G. *Musculoskeletal biomechanics*.  
(Georg Thieme Verlag, 2002).
- 204 Gordon, A. M., Huxley, A. F. & Julian, F. J. Tension development in highly  
stretched vertebrate muscle fibres. *J Physiol* **184**, 143-169 (1966).
- 205 Walker, S. M. & Schrodt, G. R. I segment lengths and thin filament periods in  
skeletal muscle fibers of the Rhesus monkey and the human. *Anat Rec* **178**, 63-81  
(1974).
- 206 Delp, S. L., Suryanarayanan, S., Murray, W. M., Uhlir, J. & Triolo, R. J.  
Architecture of the rectus abdominis, quadratus lumborum, and erector spinae. *J  
Biomech* **34**, 371-375 (2001).
- 207 Glousman, R. *et al.* Dynamic electromyographic analysis of the throwing  
shoulder with glenohumeral instability. *J Bone Joint Surg Am* **70**, 220-226 (1988).
- 208 Broca, P. Le torsion de l'humerus et le tropometre. *Revue d'Anthropologie* **4**, 193-  
210; 385-423 (1881).
- 209 Martin, C. P. The cause of torsion of the humerus and of the notch on the anterior  
edge of the glenoid cavity of the scapula. *J Anat* **67**, 573-582 (1933).
- 210 Evans, F. G. & Krahl, V. E. The torsion of the humerus: a phylogenetic study  
from fish to man. *Am J Anat* **76**, 303-307 (1945).
- 211 Krahl, V. E. & Evans, F. G. Humeral torsion in man. *Am J Phys Anthropol* **3**, 229-  
253 (1945).
- 212 Edelson, G. Variations in the retroversion of the humeral head. *J Shoulder Elbow  
Surg* **8**, 142-145 (1999).
- 213 Kronberg, M., Brostrom, L. A. & Soderlund, V. Retroversion of the humeral head  
in the normal shoulder and its relationship to the normal range of motion. *Clin  
Orthop Relat Res* **253**, 113-117 (1990).
- 214 Gegenbaur, C. Sur la torsion de l'humerus. *Ann Sci Nat Zool Biol Anim* **5**, 55-67  
(1868).
- 215 Krahl, V. E. The torsion of the humerus; its localization, cause and duration in  
man. *Am J Anat* **80**, 275-319 (1947).
- 216 Edelson, G. The development of humeral head retroversion. *J Shoulder Elbow  
Surg* **9**, 316-318 (2000).
- 217 Cowgill, L. W. Humeral torsion revisited: a functional and ontogenetic model for  
populational variation. *Am J Phys Anthropol* **134**, 472-480 (2007).
- 218 Kate, B. R. The torsion of the humerus in central India. *J Indian Anthropol Soc* **3**,  
17-30 (1968).
- 219 Rhodes, J. A. Adaptations to humeral torsion in medieval Britain. *Am J Phys  
Anthropol* **130**, 160-166 (2006).
- 220 Cook, E. E., Gray, V. L., Savinar-Nogue, E. & Medeiros, J. Shoulder antagonistic  
strength ratios: a comparison between college-level baseball pitchers and  
nonpitchers. *J Orthop Sports Phys Ther* **8**, 451-461 (1987).
- 221 Birch, R. in *Surgical disorders of the peripheral nerves* (eds R. Birch, G.  
Bonney, & C. B. Wyn Parry) 209-234 (Churchill Livingstone, 1998).
- 222 Chant, C. B., Litchfield, R., Griffin, S. & Thain, L. M. Humeral head retroversion  
in competitive baseball players and its relationship to glenohumeral rotation range  
of motion. *J Orthop Sports Phys Ther* **37**, 514-520 (2007).

- 223 Roach, N. T., Lieberman, D. E., Gill, T. J., IV, Palmer, W. E. & Gill, T. J., III. The effect of humeral torsion on rotational range of motion in the shoulder and throwing performance. *J Anat* **220**, 293-301 (2012).
- 224 Powell, J. W. & Barber-Foss, K. D. Traumatic brain injury in high school athletes. *J Am Med Assoc* **282**, 958-963 (1999).
- 225 Boden, B. P., Tacchetti, R. & Mueller, F. O. Catastrophic injuries in high school and college baseball players. *Am J Sports Med* **32**, 1189-1196, (2004).
- 226 Whiting, A. F. *Ethnobotany of the Hopi*. (North Arizona Society of Science and Art, 1939).
- 227 Parsons, E. W. C. *The social organization of the Tewa of New Mexico*. (Menasha, 1929).
- 228 Goodale, J. C. *Tiwi wives: a study of the women of Melville Island, North Australia*. (University of Washington Press, 1971).
- 229 Thomson, B. H., Sir. *The diversions of a prime minister*. (W. Blackwood and Sons, 1894).
- 230 Best, E. *The Maori*. (H. H. Tombs, 1924).
- 231 Buck, P. H. *Samoan material culture*. (The Museum, 1930).
- 232 Kenyatta, J. *Facing Mount Kenya: the tribal life of the Gikuyu*. (Secker and Warburg, 1953).
- 233 Kluckhohn, C. *Navaho material culture*. (Belknap Press, 1971).
- 234 Turnbull, C. M. *The Mbuti pygmies: Change and adaptation*. (Harcourt Brace Jovanovich College Publishers, 1983).
- 235 Thieme, H. Lower Palaeolithic hunting spears from Germany. *Nature* **385**, 807-810 (1997).
- 236 McBrearty, S. & Brooks, A. S. The revolution that wasn't: a new interpretation of the origin of modern human behavior. *J Hum Evol* **39**, 453-563 (2000).
- 237 Brooks, A. S., Yellen, J. E., Nevell, L. & Hartman, G. in *Transitions before the transition: Evolution and stability in the Middle Paleolithic and Middle Stone Age* (eds E. Hovers & S. Kuhn) 233-255 (Kluwer, 2005).
- 238 Shea, J. J. The origins of lithic projectile point technology: evidence from Africa, the Levant, and Europe. *J Archaeol Sci* **33**, 823-846 (2006).
- 239 Volman, R. P. in *Southern African prehistory and Paleoenvironments* (ed R. G. Klein) 169-220 (Balkema, 1984).
- 240 Debenath, A., Raynal, J. P., Roche, J., Texier, J. P. & Ferembach, D. Stratigraphie, habitat, typologie et devenir de l'Aterien Marocain: donnees recentes. *L'Anthropologie* **90**, 233-246 (1986).
- 241 Wilkins, J., Schoville, B. J., Brown, K. S. & Chazan, M. Evidence for early hafted hunting technology. *Science* **338**, 942-946 (2012).
- 242 Roberts, M. B. & Parfitt, S. A. *Boxgrove: A Middle Pleistocene hominid site at Earham Quarry, Boxgrove, West Sussex*. (English Heritage, 1999).
- 243 Clark, J. D. in *Congres Panafricain de Prehistoire: Actes de la IIe session (Alger 1952)* (ed L. Balout) (Arts et Metiers Graphiques, 1955).
- 244 O'Brien, E. M. The projectile capabilities of an Acheulian handaxe from Olorgesailie. *Curr Anthropol* **22**, 76-79 (1981).

- 245 Cannell, A. Throwing behaviour and the mass distribution of geological hand samples, hand grenades and Olduvian manuports. *J Archaeol Sci* **29**, 335-339 (2002).
- 246 Schmitt, D., Churchill, S. E. & Hylander, W. L. Experimental evidence concerning spear use in Neandertals and early modern humans. *J Archaeol Sci* **30**, 103-114 (2003).
- 247 Schick, K. D. & Toth, N. in *Integrative paths to the past: Paleoanthropological advances in honor of F. Clark Howell* (eds S. C. Robert & R. L. Ciochon) 429-449 (Prentice Hall, 1994).
- 248 Whittaker, J. C. & McCall, G. Handaxe-hurling hominids: an unlikely story. *Curr Anthropol* **42**, 566-572 (2001).
- 249 Larson, S. G. Evolutionary transformation of the hominin shoulder. *Evol Anthropol* **16**, 172-187 (2007).
- 250 Trinkaus, E., Churchill, S. E. & Ruff, C. B. Postcranial robusticity in Homo II: Humeral bilateral asymmetry and bone plasticity. *Am J Phys Anthropol* **93**, 1-34 (1994).
- 251 Churchill, S. E. & Formicola, V. A case of marked bilateral asymmetry in the upper limbs of an Upper Paleolithic male from Barma Grande (Liguria), Italy. *Int J Osteoarchaeol* **7**, 18-38 (1997).
- 252 Churchill, S. E., Pearson, O. M., Grine, F. E., Trinkaus, E. & Holliday, T. W. Morphological affinities of the proximal ulna from Klasies River main site: archaic or modern? *J Human Evol* **31**, 213-237 (1996).
- 253 Sisto, D. J., Jobe, F. W., Moynes, D. R. & Antonelli, D. J. An electromyographic analysis of the elbow in pitching. *Am J Sports Med* **15**, 260-263 (1987).
- 254 Drapeau, M. S., Ward, C. V., Kimbel, W. H., Johanson, D. C. & Rak, Y. Associated cranial and forelimb remains attributed to *Australopithecus afarensis* from Hadar, Ethiopia. *J Hum Evol* **48**, 593-642 (2005).
- 255 Aiello, L. C., Wood, B., Key, C. & Lewis, M. Morphological and taxonomic affinities of the Olduvai ulna (OH 36). *Am J Phys Anthropol* **109**, 89-110 (1999).
- 256 Anton, S. C. Natural history of *Homo erectus*. *Am J Phys Anthropol* **Suppl 37**, 126-170 (2003).
- 257 Churchill, S. E. *Human upper body evolution in the Eurasian Late Pleistocene* PhD thesis, University of New Mexico, Albuquerque, (1994).
- 258 Churchill, S. E., Weaver, A. H. & Niewoehner, W. A. in *Reduction processes ("chaines operatoires") in the european Mousterian* (eds A. Bietti & S. Grimaldi) 18-51 (Quaternaria Nova, 1996).
- 259 Churchill, S. E. & Rhodes, J. A. How strong were the Neandertals? Leverage and muscularity at the shoulder and elbow in Mousterian foragers. *Period Biol* **108**, 457-470 (2006).
- 260 Hirashima, M., Yamane, K., Nakamura, Y. & Ohtsuki, T. Kinetic chain of overarm throwing in terms of joint rotations revealed by induced acceleration analysis. *J Biomech* **41**, 2874-2883 (2008).
- 261 Putnam, C. A. Sequential motions of body segments in striking and throwing skills: descriptions and explanations. *J Biomech* **26 Suppl 1**, 125-135 (1993).

- 262 Feltner, M. E. 3-dimensional interactions in a 2-segment kinetic chain – 2: Application to the throwing arm in baseball pitching. *Int J Sport Biomech* **5**, 420-450 (1989).
- 263 Commandre, F. *Pathologie abarticulaire*. (Cetrane, 1977).
- 264 Dutour, O. Enthesopathies (lesions of muscular insertions) as indicators of the activities of neolithic Saharan populations. *Am J Phys Anthropol* **71**, 221-224 (1986).
- 265 Dutour, O. Activités physiques et squelette humain: le difficile passage de l'actuel au fossile. *Bull Mem Soc Anthropol Paris* **4**, 233-241 (1992).
- 266 Dutour, O. Chasse et activités physiques dans la Préhistoire: les marqueurs osseux d'activités chez l'homme fossile. *Anthropol Prehist* **111**, 156-165 (2000).
- 267 Villotte, S., Churchill, S. E., Dutour, O. J. & Henry-Gambier, D. Subsistence activities and the sexual division of labor in the European Upper Paleolithic and Mesolithic: evidence from upper limb enthesopathies. *J Hum Evol* **59**, 35-43 (2010).
- 268 Ouellette, H., Bredella, M., Labis, J., Palmer, W. E. & Torriani, M. MR imaging of the elbow in baseball pitchers. *Skeletal Radiol* **37**, 115-121 (2008).
- 269 Lordkipanidze, D. *et al.* Postcranial evidence from early Homo from Dmanisi, Georgia. *Nature* **449**, 305-310 (2007).
- 270 Jungers, W. L. Ape and hominid limb length. *Nature* **369**, 194 (1994).
- 271 Kagaya, M., Ogiwara, N. & Nakatsukasa, M. Is the clavicle of apes long? An investigation of clavicular length in relation to body mass and upper thoracic width. *Int J Primatol* **31**, 209-217 (2010).
- 272 Lieberman, D. E. *et al.* Foot strike patterns and collision forces in habitually barefoot versus shod runners. *Nature* **463**, 531-535 (2010).
- 273 Pontzer, H., Holloway, J. H., 3rd, Raichlen, D. A. & Lieberman, D. E. Control and function of arm swing in human walking and running. *J Exp Biol* **212**, 523-534 (2009).
- 274 Winter, D. A. *Biomechanics and motor control of human movement*. 2nd edn, (Wiley-Interscience, 1990).
- 275 Dillman, C. J., Fleisig, G. S. & Andrews, J. R. Biomechanics of pitching with emphasis upon shoulder kinematics. *J Orthop Sports Phys Ther* **18**, 402-408 (1993).
- 276 Dempster, W. T. *Space requirements for the seated operator*. (Wright Air Development Center, 1955).
- 277 Hong, D. A., Cheung, T. K. & Roberts, E. M. A three-dimensional, six-segment chain analysis of forceful overarm throwing. *J Electromyogr Kinesiol* **11**, 95-112 (2001).
- 278 Hirashima, M., Kudo, K., Watarai, K. & Ohtsuki, T. Control of 3d limb dynamics in unconstrained overarm throws of different speeds performed by skilled baseball players. *J Neurophysiol* **97**, 680-691 (2007).
- 279 Debicki, D. B., Gribble, P. L., Watts, S. & Hore, J. Wrist muscle activation, interaction torque and mechanical properties in unskilled throws of different speeds. *Exp Brain Res* **208**, 115-125 (2011).

- 280 Hore, J., Debicki, D. B., Gribble, P. L. & Watts, S. Deliberate utilization of interaction torques brakes elbow extension in a fast throwing motion. *Exp Brain Res* **211**, 63-72 (2011).
- 281 Pappas, A. M., Zawacki, R. M. & Sullivan, T. J. Biomechanics of baseball pitching: A preliminary report. *Am J Sports Med* **13**, 216-222 (1985).
- 282 Feltner, M. & Dapena, J. Dynamics of the shoulder and elbow joints of the throwing arm during a baseball pitch. *Int J Sport Biomech* **2**, 235-259 (1986).
- 283 Fleisig, G. S., Barrentine, S. W., Zheng, N., Escamilla, R. F. & Andrews, J. R. Kinematic and kinetic comparison of baseball pitching among various levels of development. *J Biomech* **32**, 1371-1375 (1999).
